# Supplementary material for: Construction of supramolecular hyperbranched polymers via the “tweezering directed self-assembly” strategy
Source: Royal Society of Chemistry journal article supplement (doi:10.1039/c4cc03158j), 2014-06-02
Supplement: c4cc03158j1.pdf [file c4cc03158j1.pdf]

---

## Construction of Supramolecular Hyperbranched Polymers *via* “Tweezering Directed Self-Assembly” Strategy

Yu-Kui Tian,<sup>a</sup> Zhi-Shuai Yang,<sup>a</sup> Xiao-Qin Lv,<sup>a</sup> Ri-Sheng Yao<sup>\*b</sup> and Feng Wang<sup>\*a</sup>

<sup>a</sup> Key Laboratory of Soft Matter Chemistry,  
Department of Polymer Science and Engineering,  
University of Science and Technology of China,  
Hefei, Anhui 230026 (P. R. China)  
Fax: (+86) 551 3606 095; E-mail: [drfwang@ustc.edu.cn](mailto:drfwang@ustc.edu.cn).

<sup>b</sup> School of Medical Engineering,  
Hefei University of Technology,  
Hefei, Anhui 230009 (P. R. China).  
E-mail: [Rishengyao@163.com](mailto:Rishengyao@163.com)

### Supporting Information

|     |                                                                                  |     |
|-----|----------------------------------------------------------------------------------|-----|
| 1.  | <i>Materials and Methods</i>                                                     | S2  |
| 2.  | <i>Synthetic routes to the targeted monomers 1–3</i>                             | S3  |
| 3.  | <i>UV/Vis titration between 6 and pyrene</i>                                     | S27 |
| 4.  | <i><sup>1</sup>H NMR titration between 6 and 7</i>                               | S28 |
| 5.  | <i>UV/Vis titration experiments for complexes 6/2 and 1/2</i>                    | S29 |
| 6.  | <i>Molecular recognition studies for the four monotopic compounds</i>            | S30 |
| 7.  | <i>Complexation studies for 1–3 via step-wise self-assembly pathway</i>          | S31 |
| 8.  | <i>COSY NMR spectra for the mixture of 1–3</i>                                   | S32 |
| 9.  | <i>DOSY experiments for the linear and hyperbranched supramolecular polymers</i> | S33 |
| 10. | <i>Stimuli-responsive properties for 5</i>                                       | S34 |

---

## 1. Materials and Methods

Diphenylammonium triflate (DPAT), 2-methyl-3-butyn-2-ol, copper(I) iodide (CuI), 3-bromoacetophenone, N-(3-(dimethylamino)propyl)-N'-ethylcarbodiimide hydrochloride (EDC·HCl), 4-dimethylamino pyridine (DMAP), and trimethylsilylacetylene were reagent grade and used as received. [Pt(tpy)Cl](PF<sub>6</sub>),<sup>[S1]</sup> Benzo-21-crown-7 acid,<sup>[S2]</sup> compound **8**,<sup>[S2]</sup> [Au(C<sup>^</sup>N<sup>^</sup>C)Cl] (C<sup>^</sup>N<sup>^</sup>C = 2,6-diphenylpyridine),<sup>[S3]</sup> 4-ethenylphenol,<sup>[S4]</sup> and 4-((10-bromodecyl)oxy)benzaldehyde<sup>[S5]</sup> were synthesized according to the previously reported procedures. Compounds **6**, **9**, **10** and 4-[(12-hydroxydodecyl)oxy]benzaldehyde were synthesized according to our previously reported paper.<sup>[S6]</sup> Other reagents and solvents were employed as purchased.

<sup>1</sup>H NMR spectra were collected on a Varian Unity INOVA-300 or INOVA-400 spectrometer with TMS as the internal standard. <sup>13</sup>C NMR spectra were recorded on a Varian Unity INOVA-400 spectrometer at 100 MHz. Two-dimensional COSY experiments were performed on a Varian Unity INOVA-400 MHz spectrometer. Electrospray ionization mass spectra (ESI-MS) were obtained on a Bruker Esquire 3000 plus mass spectrometer (Bruker-Franzen Analytik GmbH Bremen, Germany) equipped with an ESI interface and ion trap analyzer. Time-of-flight mass spectra (TOF-MS) were obtained on matrix-assisted laser desorption/ionization TOF/TOF MS (autoflex speed TOF/TOF, Bruker). UV/Vis spectra were recorded on a UV-1800 Shimadzu spectrometer.

## 2. Synthetic route to the targeted monomers 1–3

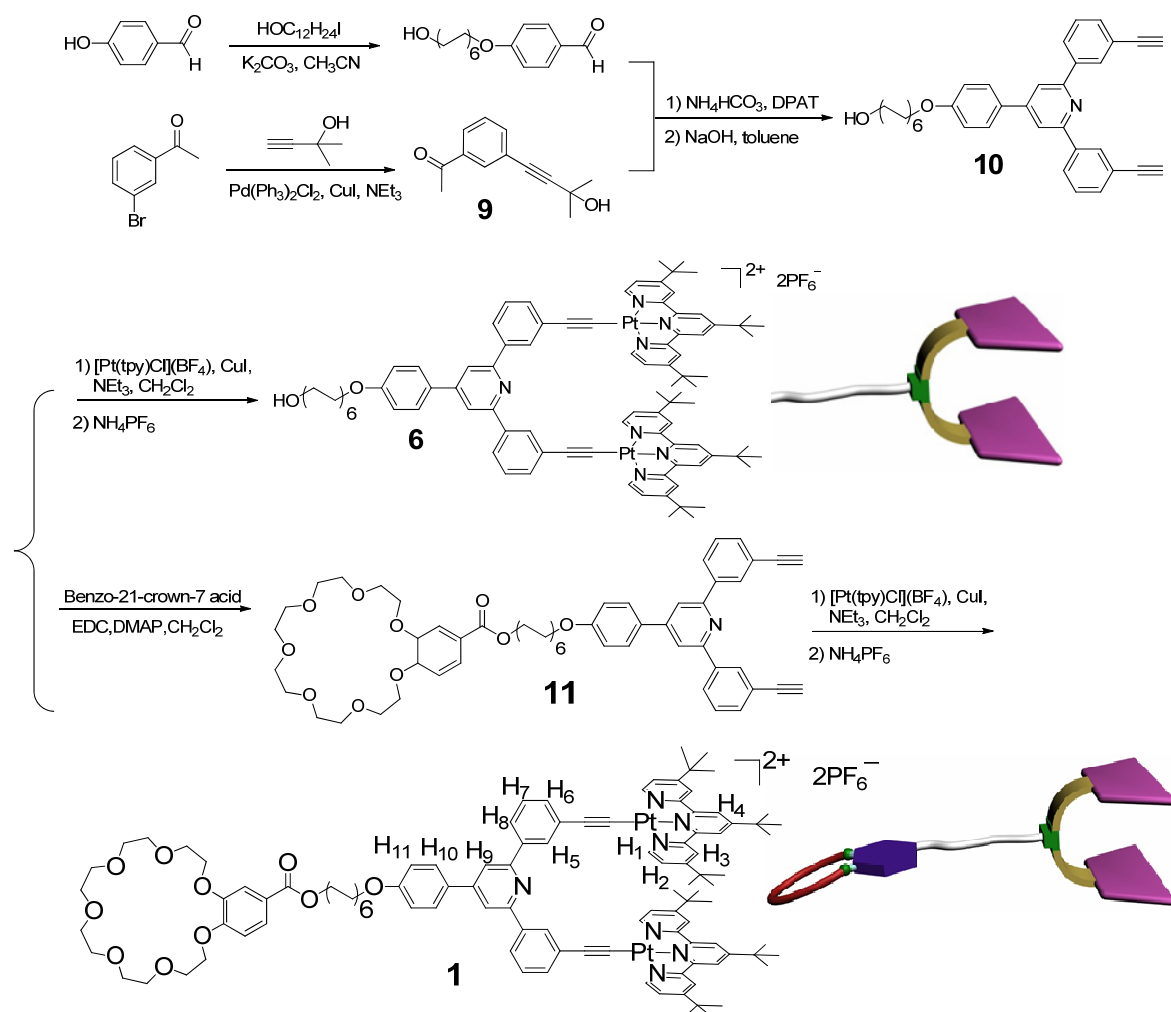

Scheme S1. Synthetic route to monomer 1.

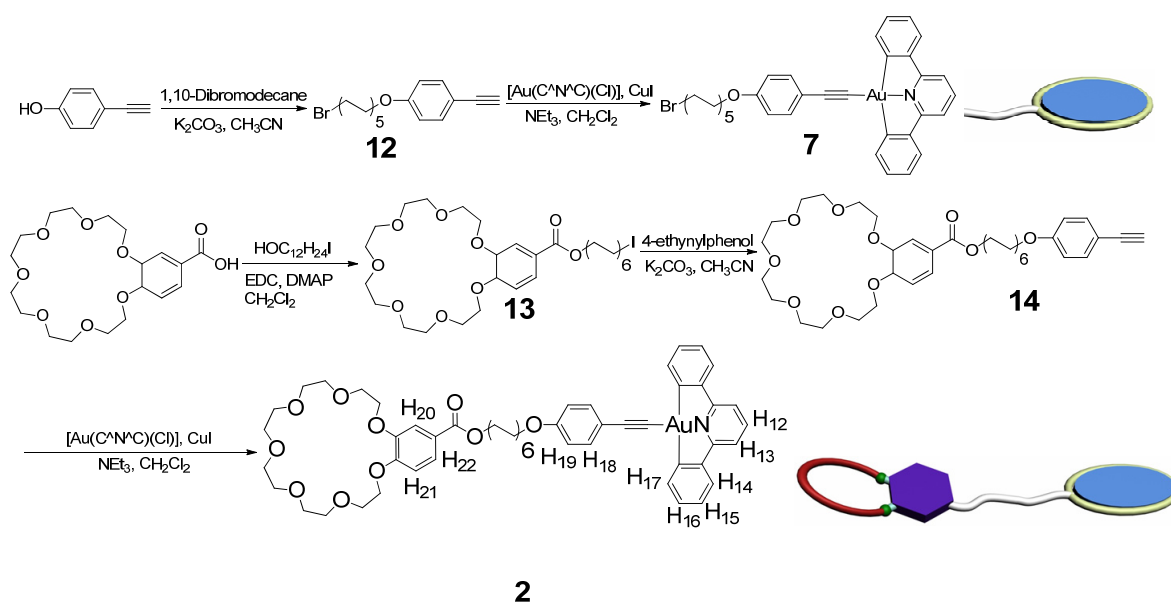

Scheme S2. Synthetic route to monomers 2.

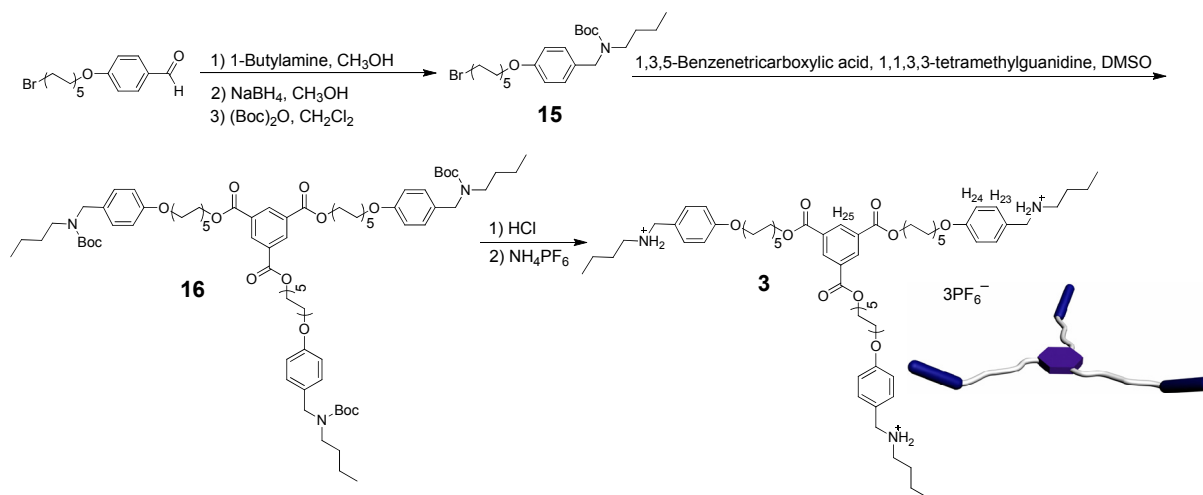

**Scheme S3.** Synthetic route to monomer **3**.

## 2.1. Synthesis of compound **11**

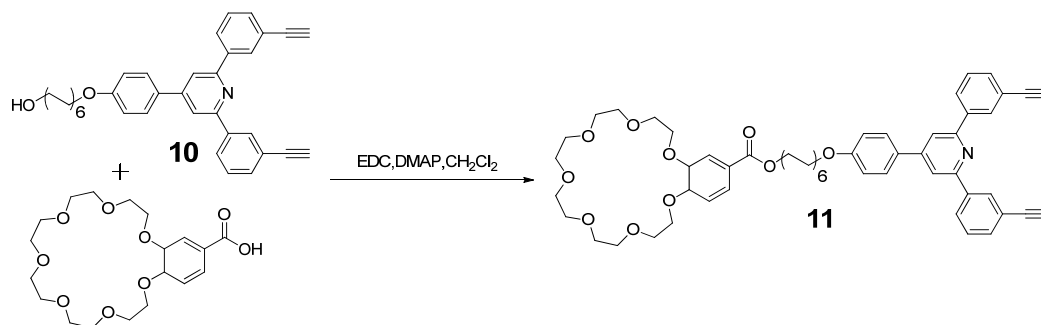

Benzo-21-crown-7 acid (520 mg, 1.30 mmol), compound **10** (620 mg, 1.30 mmol), EDC·HCl (600 mg, 3.16 mmol) and DMAP (50.0 mg, 0.41 mmol) in 30 mL CH<sub>2</sub>Cl<sub>2</sub> were placed in a 50 mL round-bottom flask and the mixture was stirred for 24 hours at room temperature. After the reaction was complete, the solvent was extracted with H<sub>2</sub>O/CH<sub>2</sub>Cl<sub>2</sub>. The combined organic extracts were removed with a rotary evaporator and the residue was purified by flash column chromatography (ethyl acetate/CH<sub>2</sub>Cl<sub>2</sub>, 1 : 2 v/v as the eluent) to provide compound **11** as a colorless oil (788 mg, 66%). The <sup>1</sup>H NMR spectrum of compound **11** is shown in Figure S1. <sup>1</sup>H NMR (300 MHz, CDCl<sub>3</sub>, room temperature) δ (ppm): 8.29 (s, 2H), 8.21 (d, *J* = 7.8 Hz, 2H), 7.86 (s, 2H), 7.70 (d, *J* = 8.7 Hz, 2H), 7.65 (m, 1H), 7.56 (m, 3H), 7.48 (t, *J* = 7.7 Hz, 2H), 7.04 (d, *J* = 8.7 Hz, 2H), 6.86 (d, *J* = 8.5 Hz, 1H), 4.28 (t, *J* = 6.6 Hz, 2H), 4.24–4.15 (m, 4H), 4.04 (t, *J* = 6.5 Hz, 2H), 3.94 (m, 4H), 3.80 (m, 4H), 3.74 (m, 4H), 3.67 (m, 8H), 3.15 (s, 2H), 1.89–1.72 (m, 6H), 1.31 (s, 14H). The <sup>13</sup>C NMR spectrum of compound **11** is shown in Figure S2. <sup>13</sup>C NMR (75 MHz, CDCl<sub>3</sub>, room temperature) δ (ppm): 166.4, 160.2, 156.4, 152.8, 150.0, 148.2, 139.7, 132.6, 130.7, 130.5, 128.8, 127.7, 123.8, 123.3, 122.5, 116.9, 115.1, 114.6, 112.2, 83.7, 71.3, 71.2, 71.1, 71.0, 70.6, 69.6, 69.5, 69.3,

69.1, 68.2, 65.0, 60.4, 29.6, 29.5, 29.4, 29.3, 29.2, 28.8, 26.0. ESI-MS  $m/z$ :  $[M + H]^+$ ,  $C_{58}H_{68}NO_{10}$ , 938.48358.

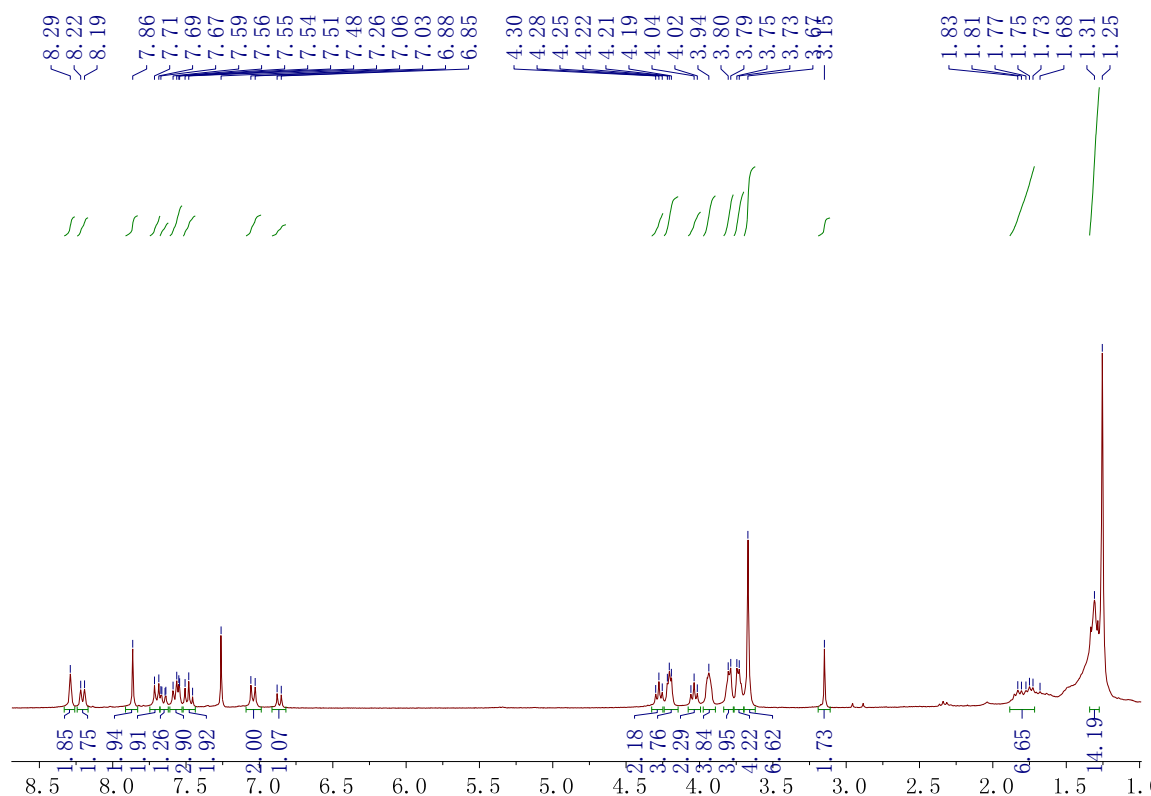

**Figure S1.** <sup>1</sup>H NMR spectrum (300 MHz, CDCl<sub>3</sub>, room temperature) of compound **11**.

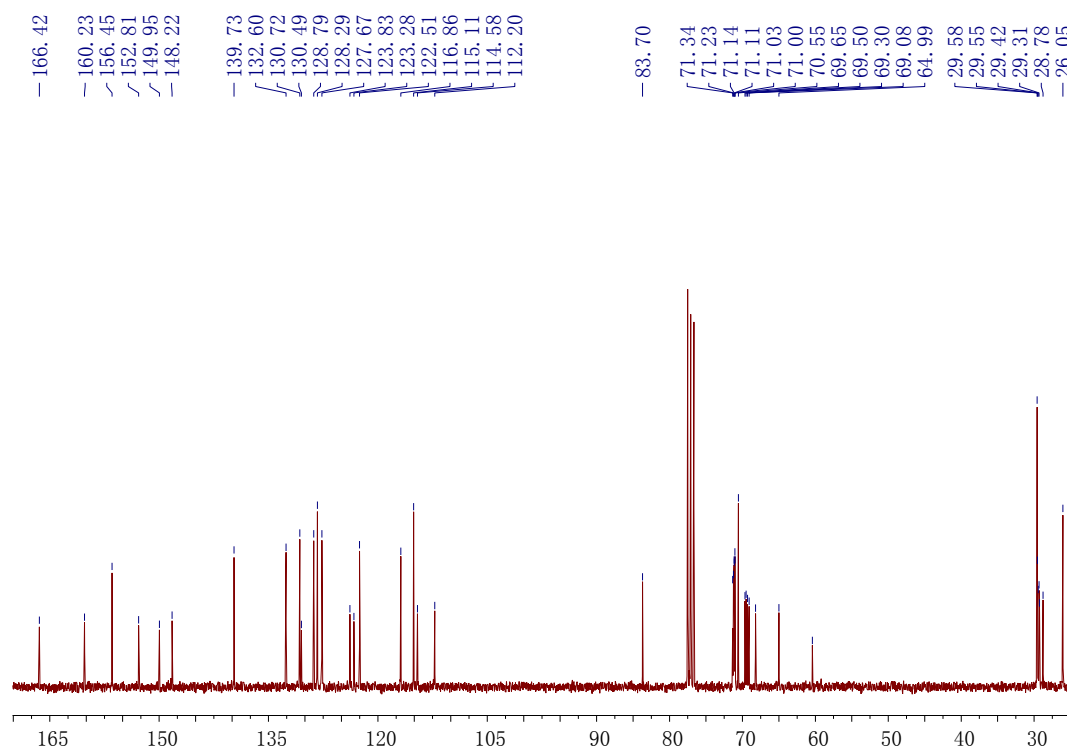

**Figure S2.** <sup>13</sup>C NMR spectrum (75 MHz, CDCl<sub>3</sub>, room temperature) of compound **11**.

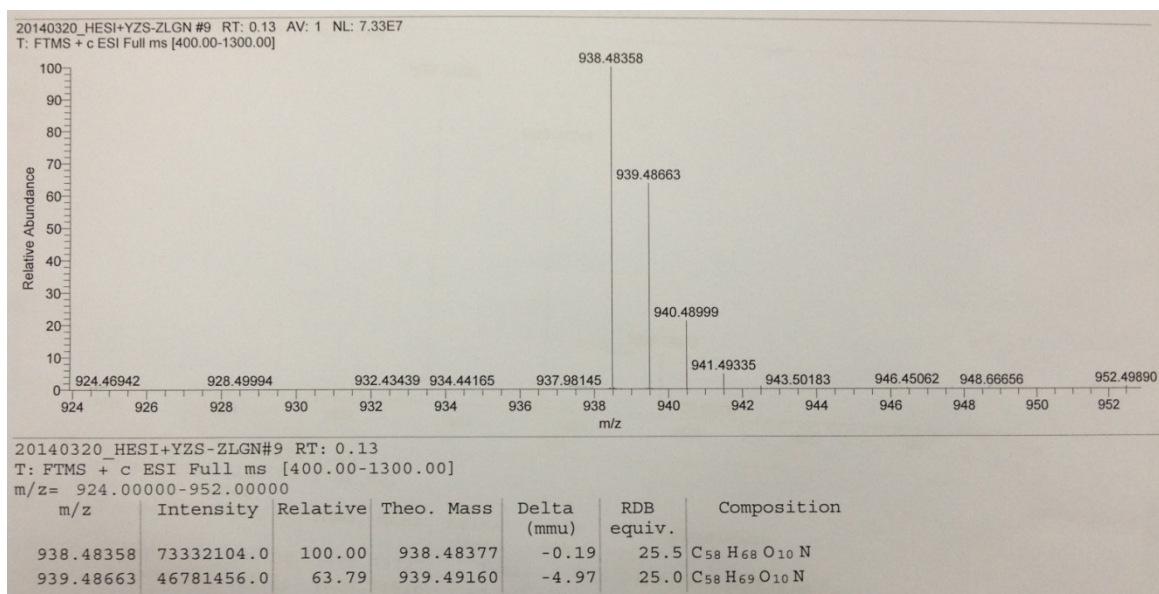

**Figure S3.** Electrospray ionization spectrum of compound **11**.

## 2.2. Synthesis of compound **6**

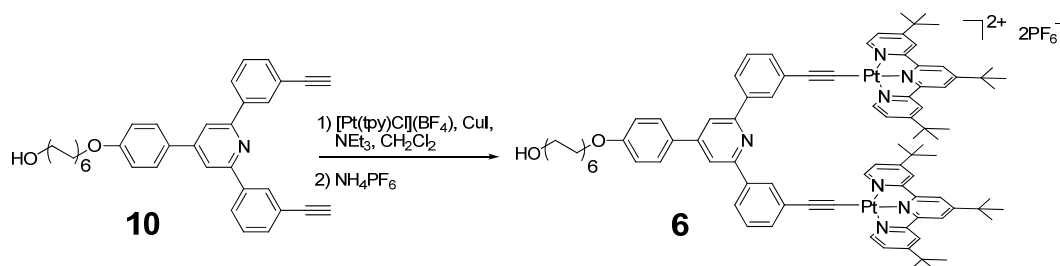

Compound **10** (150 mg, 0.27 mmol), [Pt(tpy)Cl](BF<sub>4</sub>) (430 mg, 0.60 mmol), CuI (10.0 mg, 0.05 mmol) and NEt<sub>3</sub> (5 mL) in 50 mL CH<sub>2</sub>Cl<sub>2</sub> were stirred at room temperature for 48 hours under nitrogen atmosphere. The mixture was evaporated under reduced pressure and the residue was purified by flash column chromatograph (acetone/CH<sub>2</sub>Cl<sub>2</sub>, 1 : 20 v/v as the eluent) to afford a yellow solid. The solid was dissolved in CH<sub>3</sub>CN and the NH<sub>4</sub>PF<sub>6</sub> was added. The resulting solution was stirred at room temperature for 1 hour and washed with H<sub>2</sub>O/CH<sub>2</sub>Cl<sub>2</sub>. The organic extracts were dried over anhydrous Na<sub>2</sub>SO<sub>4</sub> and evaporated with a rotary evaporator to afford compound **6** as a red solid (300 mg, 54%). Mp: 210.0–213.5 °C. The <sup>1</sup>H NMR spectrum of compound **6** is shown in Figure S4. The aromatic protons on **6** display severe signal broadening phenomena in <sup>1</sup>H NMR spectrum, which probably results from the irregular capture of one diphenylpyridine unit by another molecular tweezer unit to form disordered self-recognition structures. The <sup>13</sup>C NMR spectrum of compound **6** is shown in Figure S5. <sup>13</sup>C NMR (100 MHz, CDCl<sub>3</sub>, room temperature) δ (ppm): 166.6, 165.1, 160.4,

157.7, 155.8, 153.5, 153.0, 138.4, 132.3, 131.9, 130.3, 129.7, 128.4, 127.8, 125.5, 125.3, 121.8, 120.6, 115.3, 111.5, 102.8, 98.1, 68.2, 63.0, 47.6, 36.8, 36.0, 32.8, 31.9, 30.2, 30.0, 29.7, 29.6, 29.5, 29.4, 29.3, 26.2, 25.8. ESI-MS  $m/z$ :  $[M - 2PF_6]^{2+}$ ,  $C_{93}H_{109}N_7O_2Pt_2$ , 873.4.

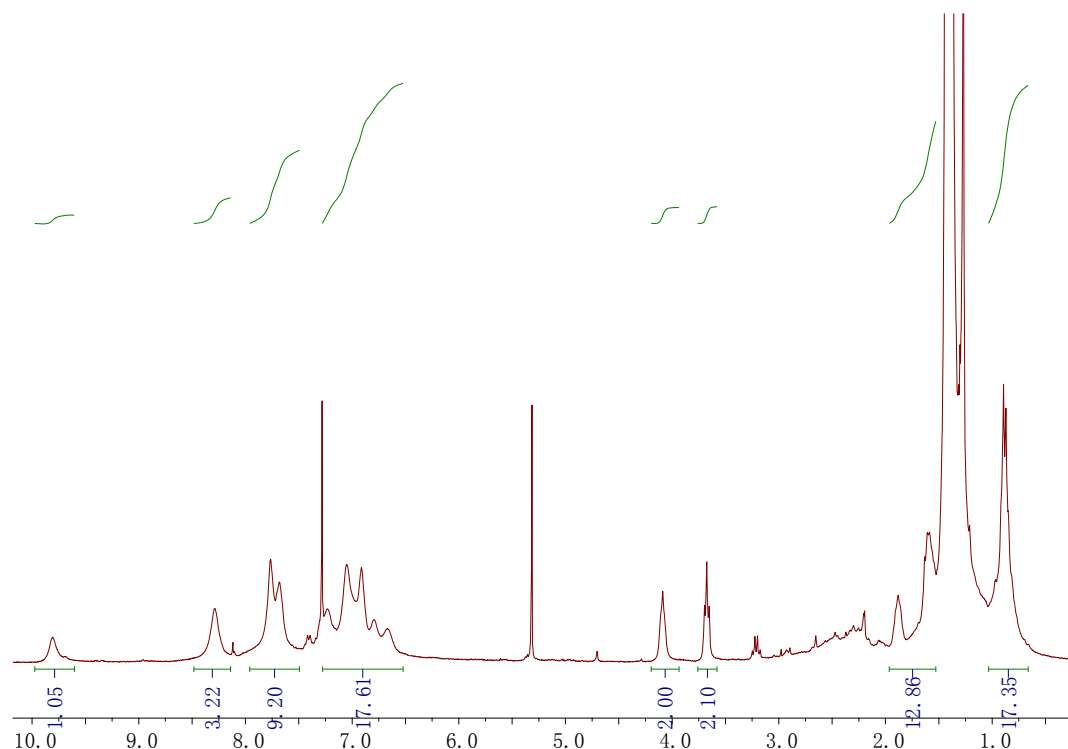

**Figure S4.**  $^1H$  NMR spectrum (300 MHz,  $CDCl_3$ , room temperature) of compound **6**.

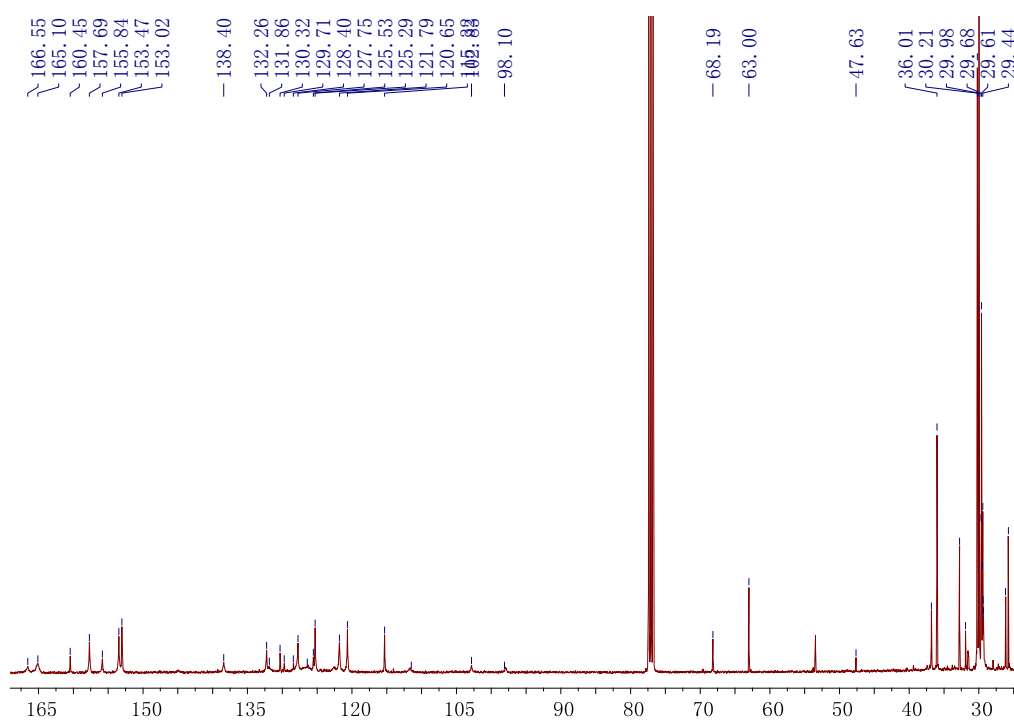

**Figure S5.**  $^{13}C$  NMR spectrum (100 MHz,  $CDCl_3$ , room temperature) of compound **6**.

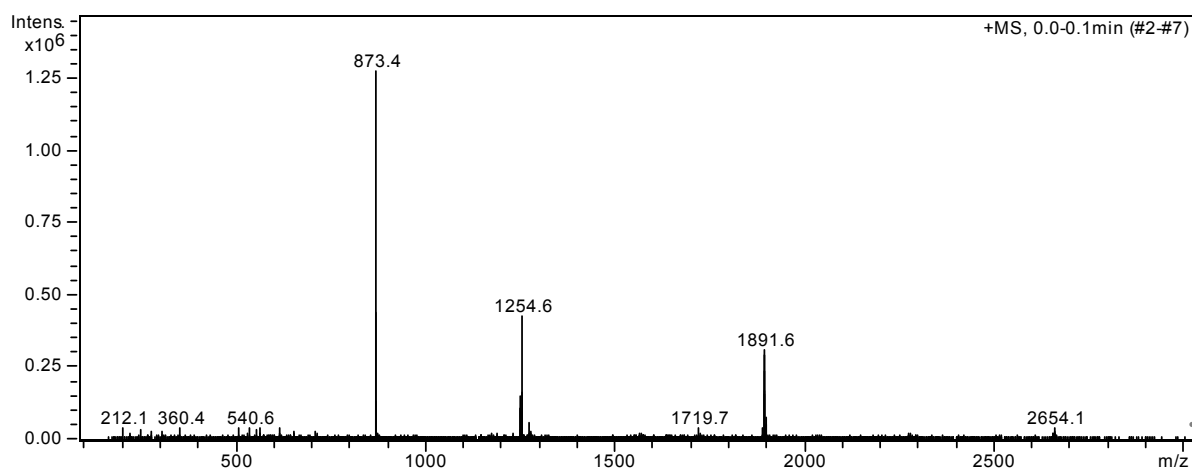

**Figure S6.** Electrospray ionization spectrum of compound **6**.

### 2.3. Synthesis of monomer **1**

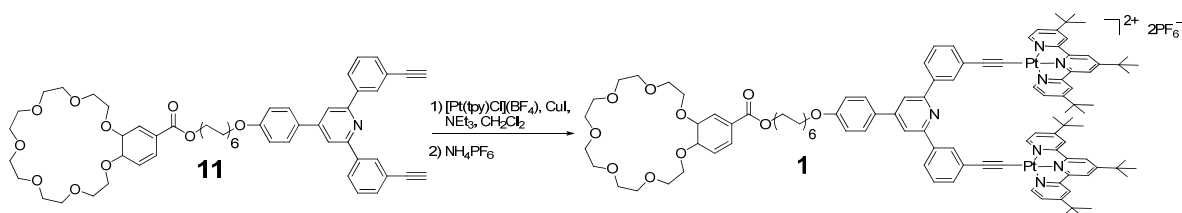

Compound **11** (230 mg, 0.25 mmol), [Pt(tpy)Cl](BF<sub>4</sub>) (390 mg, 0.54 mmol), CuI (10.0 mg, 0.06 mmol) and NEt<sub>3</sub> (3 mL) in 30 mL CH<sub>2</sub>Cl<sub>2</sub> were stirred at room temperature for 48 hours under nitrogen atmosphere. After the reaction was complete, the solvent was evaporated under reduced pressure and the residue was purified by flash column chromatograph (acetone/CH<sub>2</sub>Cl<sub>2</sub>, 1 : 20 v/v as the eluent) to afford a red solid. The solid was dissolved in CH<sub>3</sub>CN and then NH<sub>4</sub>PF<sub>6</sub> was added. The result solution was stirred at room temperature for 1 hour, and then washed with H<sub>2</sub>O/CH<sub>2</sub>Cl<sub>2</sub>. The organic extracts were dried over anhydrous Na<sub>2</sub>SO<sub>4</sub> and evaporated with a rotary evaporator to afford compound **1** as a red solid (310 mg, 51%). Mp: 180.1–182.8 °C. The <sup>1</sup>H NMR spectrum of compound **1** is shown in Figure S7. Similar to **6**, the aromatic protons on **1** also display signal broadening phenomena in <sup>1</sup>H NMR spectrum, which probably results from the irregular capture of one diphenylpyridine unit by another molecular tweezer unit to form disordered self-recognition structures. The <sup>13</sup>C NMR spectrum of compound **1** is shown in Figure S8. <sup>13</sup>C NMR (100 MHz, CDCl<sub>3</sub>, room temperature) δ (ppm): 166.4, 165.1, 160.5, 157.7, 155.8, 153.5, 153.0, 152.8, 148.2, 139.2, 138.4, 132.2, 127.7, 125.3, 123.9, 123.3, 122.6, 121.8, 120.6, 115.4, 114.7, 114.0, 112.3, 102.8, 97.8, 71.2, 71.1, 71.0, 70.9, 70.5, 69.6, 69.5, 69.3, 69.0, 68.2, 65.0, 36.8, 36.0, 33.8,



31.9, 30.3, 30.2, 30.0, 29.7, 29.6, 29.5, 29.4, 29.3, 29.1, 28.9, 28.8, 26.2, 26.1, 22.7.  
MALDI-TOF MS  $m/z$ :  $[M - PF_6]^+$ ,  $C_{112}H_{135}PF_6N_7O_{10}Pt_2$ , 2272.9208.

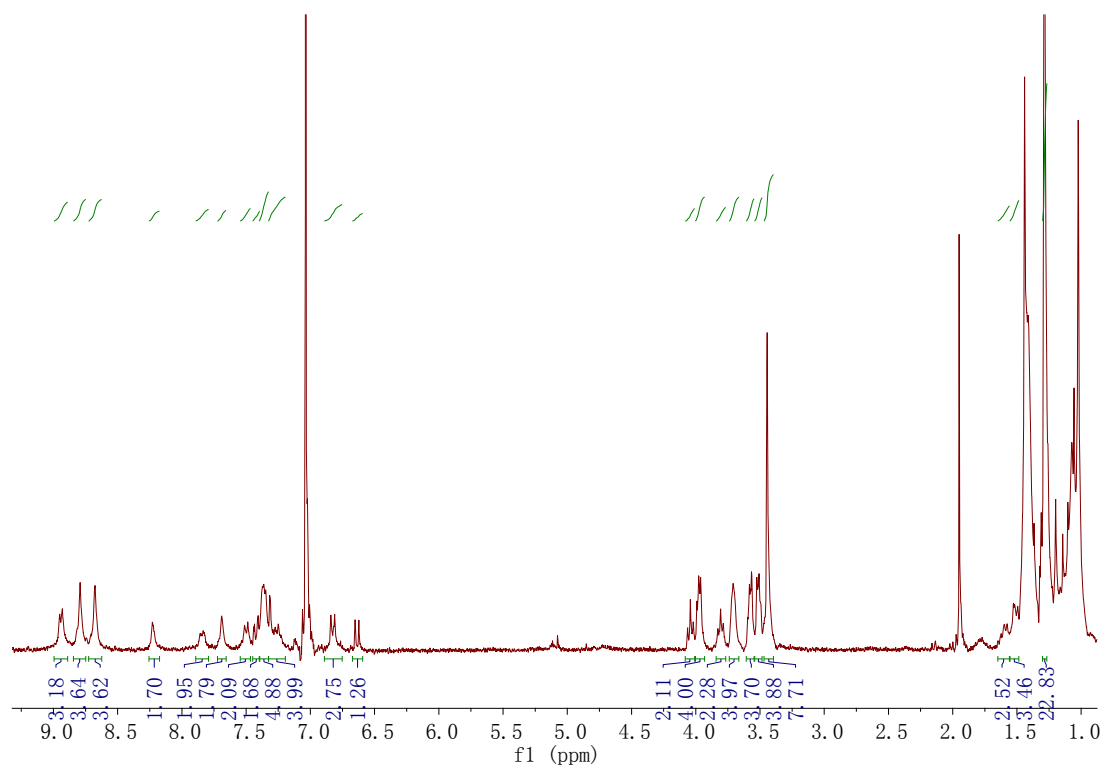

**Figure S7.**  $^1H$  NMR spectrum (300 MHz,  $CDCl_3$ , room temperature) of monomer **1**.

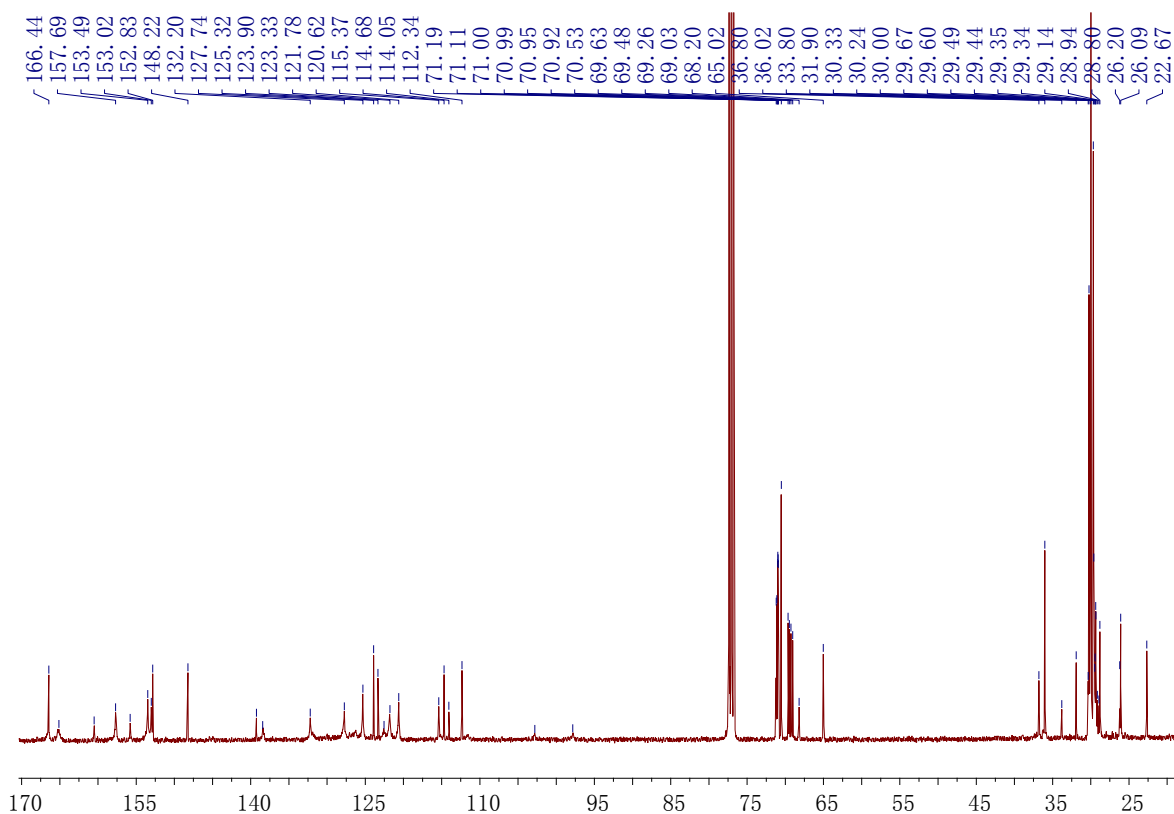

**Figure S8.**  $^{13}C$  NMR spectrum (100 MHz,  $CDCl_3$ , room temperature) of monomer **1**.

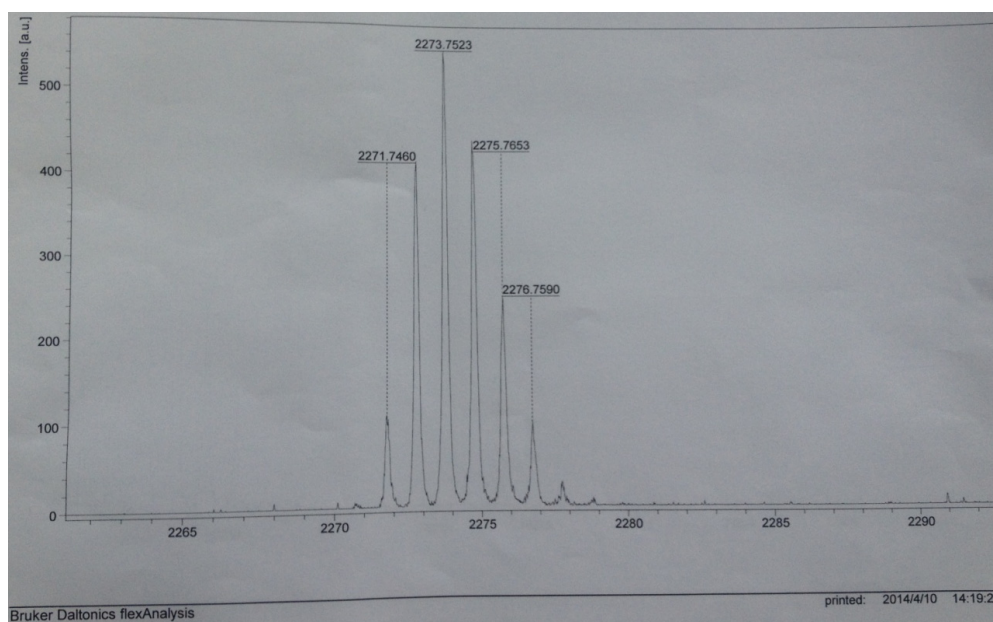

**Figure S9.** MALDI-TOF spectrum of monomer **1**.

#### 2.4. Synthesis of compound **12**

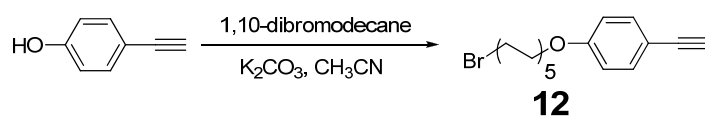

4-Ethynylphenol (500 mg, 4.23 mmol) and  $\text{K}_2\text{CO}_3$  (2.00 g, 14.5 mmol) were placed in a 150 mL round-bottom flask. 1,10-Dibromodecane (6.00 g, 20.0 mmol) in  $\text{CH}_3\text{CN}$  (100 mL) was added and the resulting mixture was stirred at 50 °C for 36 hours. The solvent was evaporated under reduced pressure and the residue was extracted with  $\text{H}_2\text{O}/\text{CH}_2\text{Cl}_2$ . After the combined organic extracts were dried over anhydrous  $\text{Na}_2\text{SO}_4$  and evaporated with a rotary evaporator, the residue was purified by flash column chromatography (petroleum ether as the eluent) to afford compound **12** as a yellow solid (1.10 g, 77%). Mp: 66.5–68.7 °C. The  $^1\text{H}$  NMR spectrum of compound **12** is shown in Figure S10.  $^1\text{H}$  NMR (300 MHz,  $\text{CDCl}_3$ , room temperature)  $\delta$  (ppm): 7.39 (d,  $J = 8.3$  Hz, 2H), 6.81 (d,  $J = 8.2$  Hz, 2H), 3.93 (t,  $J = 6.4$  Hz, 2H), 3.39 (t,  $J = 6.8$  Hz, 2H), 2.97 (s, 1H), 1.91–1.68 (m, 4H), 1.40 (m, 4H), 1.29 (m, 8H). The  $^{13}\text{C}$  NMR spectrum of compound **12** is shown in Figure S11.  $^{13}\text{C}$  NMR (75 MHz,  $\text{CDCl}_3$ , room temperature)  $\delta$  (ppm): 159.5, 133.6, 114.4, 113.9, 83.8, 75.7, 68.0, 34.1, 32.8, 29.4, 29.3, 29.2, 28.8, 28.2, 26.0. EI-MS  $m/z$ :  $[\text{M} - \text{e}]^+$ ,  $\text{C}_{18}\text{H}_{25}\text{O}^{81}\text{Br}$ , 338.1063.

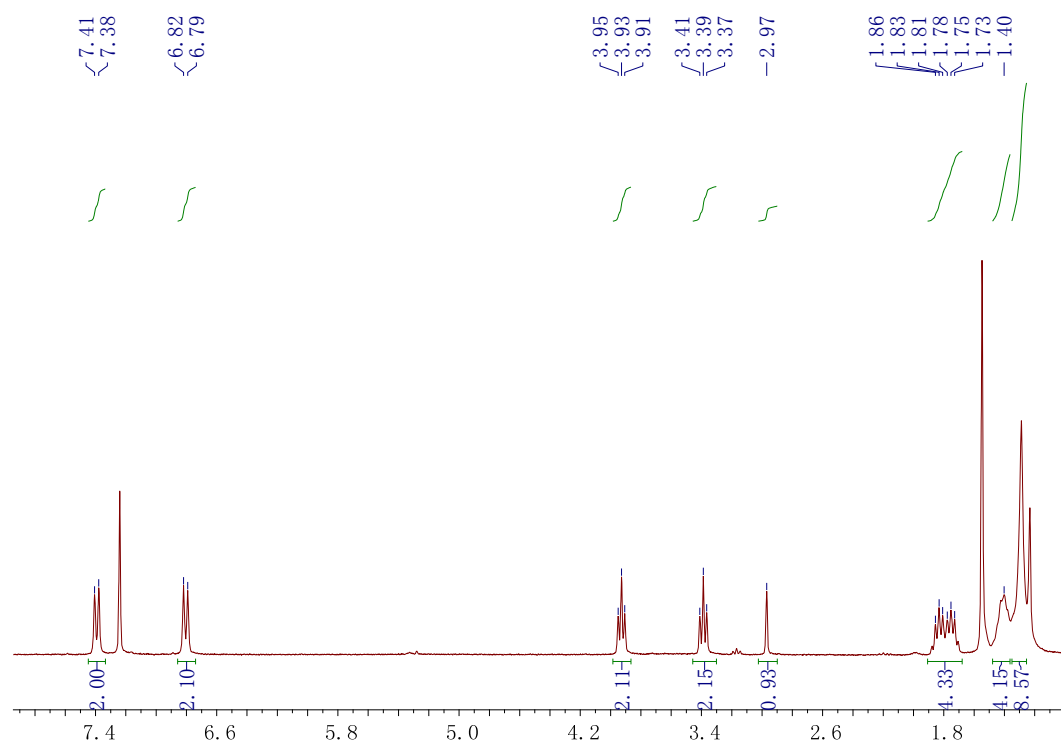

**Figure S10.**  $^1\text{H}$  NMR spectrum (300 MHz,  $\text{CDCl}_3$ , room temperature) of compound **12**.

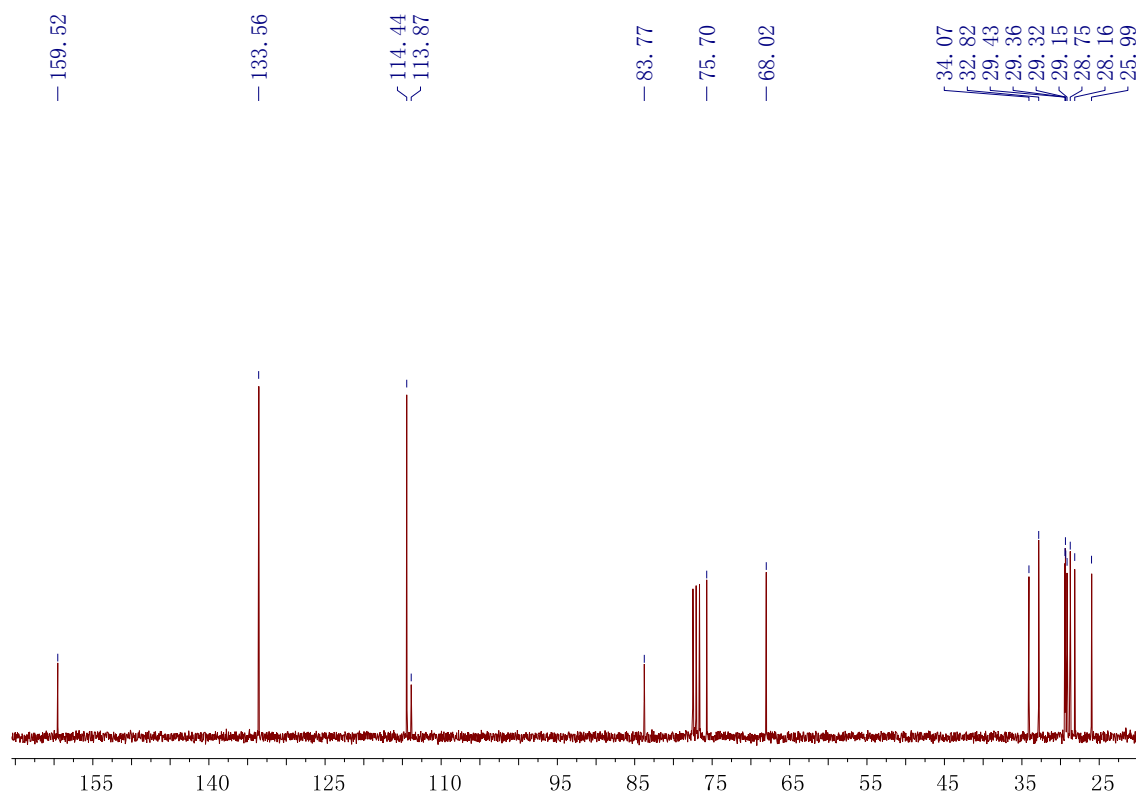

**Figure S11.**  $^{13}\text{C}$  NMR spectrum (75 MHz,  $\text{CDCl}_3$ , room temperature) of compound **12**.

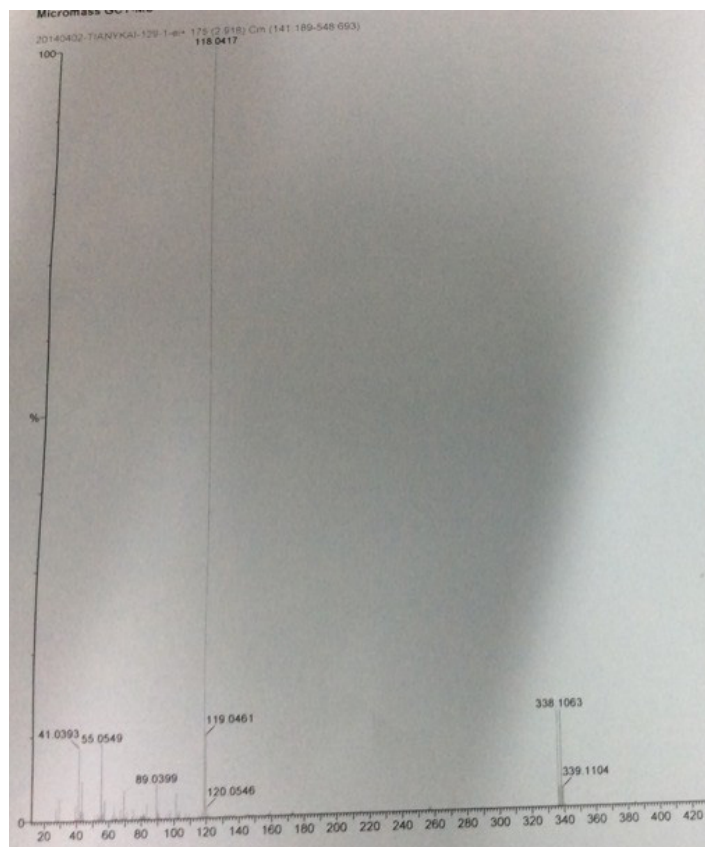

**Figure S12.** Electron ionization spectrum of compound **12**.

## 2.5. Synthesis of compound **7**

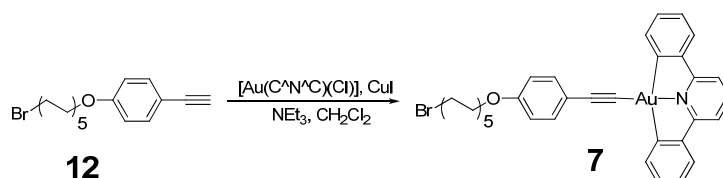

Compound **12** (80.0 mg, 0.24 mmol),  $[\text{Au}(\text{C}\equiv\text{N})\text{C}](\text{Cl})$  (100 mg, 0.22 mmol), CuI (9.50 mg, 0.05 mmol) and  $\text{NEt}_3$  (0.50 mL) in 5 mL  $\text{CH}_2\text{Cl}_2$  were stirred at room temperature for 48 hours under nitrogen atmosphere. After the reaction was complete, the solvent was evaporated under reduced pressure and the residue was purified by flash column chromatograph (petroleum ether/ $\text{CH}_2\text{Cl}_2$ , 3 : 1 v/v as the eluent) to afford compound **7** as a yellow solid (120 mg, 72%). Mp: 120.1–122.0 °C. The  $^1\text{H}$  NMR spectrum of compound **7** is shown in Figure S13.  $^1\text{H}$  NMR (300 MHz,  $\text{CDCl}_3$ , room temperature)  $\delta$  (ppm): 8.09 (d,  $J = 7.2$  Hz, 2H), 7.84 (t,  $J = 7.9$  Hz, 1H), 7.53 (d,  $J = 8.0$  Hz, 4H), 7.46 (d,  $J = 8.0$  Hz, 2H), 7.38 (t,  $J = 7.4$  Hz, 2H), 7.24 (m, 2H), 6.84 (d,  $J = 8.2$  Hz, 2H), 3.96 (t,  $J = 6.3$  Hz, 2H), 3.40 (t,  $J = 6.8$  Hz, 2H), 1.91–1.71 (m, 4H), 1.42 (m, 4H), 1.30 (m, 8H). The  $^{13}\text{C}$  NMR spectrum of compound **7** is shown in Figure S14.  $^{13}\text{C}$  NMR (75 MHz,  $\text{CDCl}_3$ , room temperature)  $\delta$  (ppm): 166.9, 164.8, 158.2, 149.0, 142.1, 136.6, 133.1, 131.8, 126.6, 125.2, 118.8, 116.8, 114.3, 100.6, 89.3, 68.0,

34.1, 32.8, 29.5, 29.4, 29.3, 28.8, 28.2, 26.0. MALDI-TOF MS  $m/z$ :  $[M - e]^+$ ,  $C_{35}H_{35}AuBrNO$ , 761.1443.

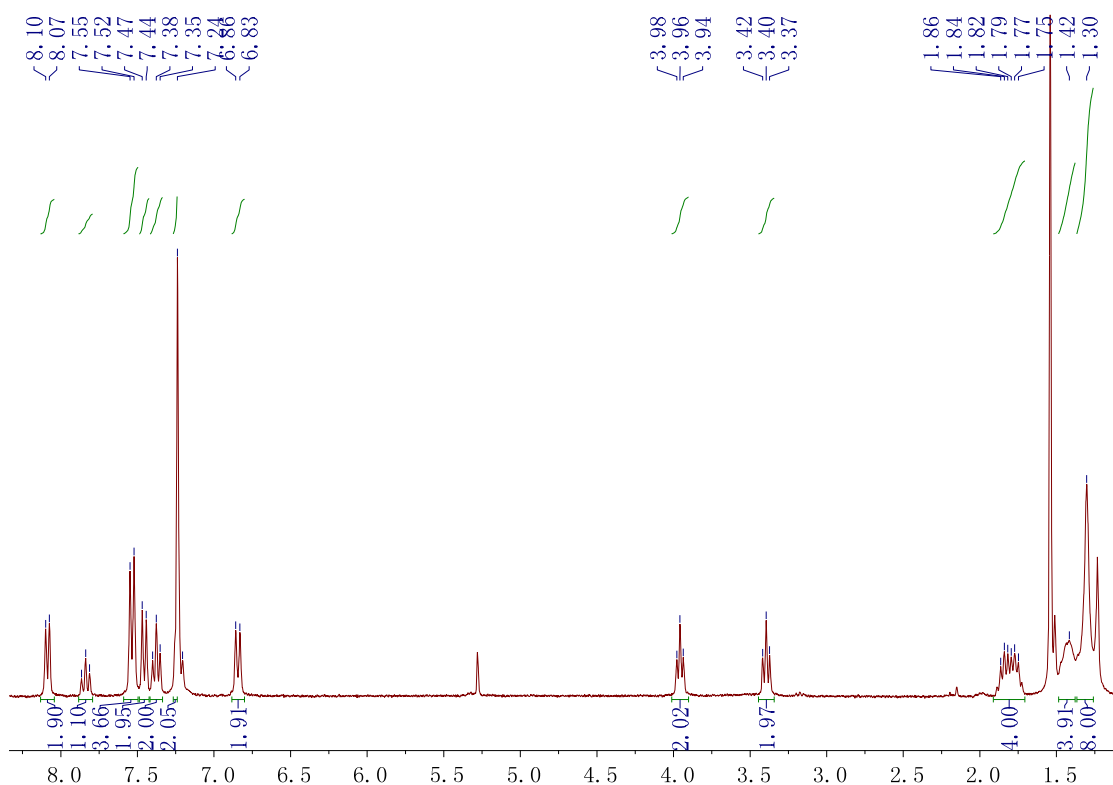

**Figure S13.** <sup>1</sup>H NMR spectrum (300 MHz, CDCl<sub>3</sub>, room temperature) of compound 7.

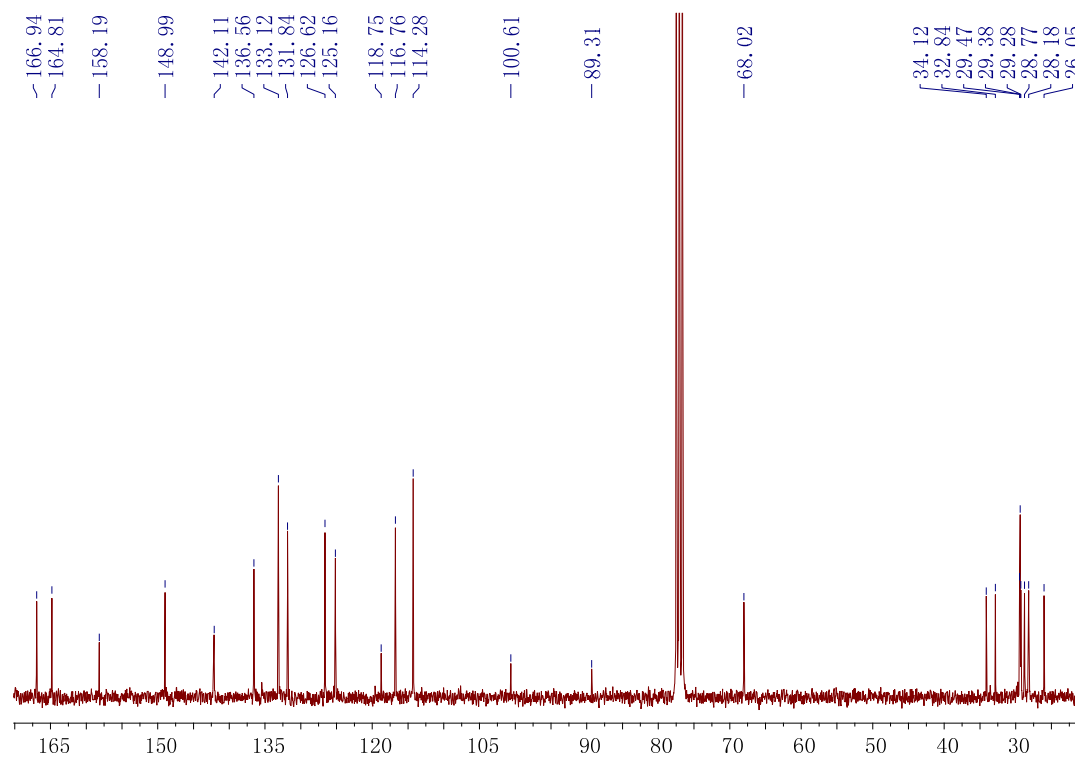

**Figure S14.** <sup>13</sup>C NMR spectrum (75 MHz, CDCl<sub>3</sub>, room temperature) of compound 7.

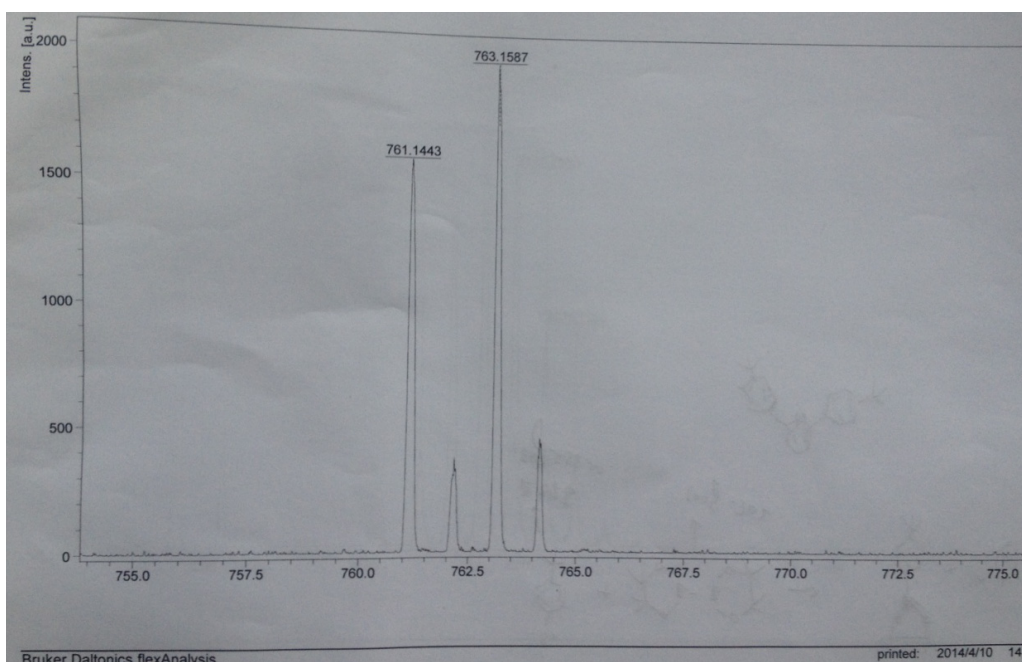

**Figure S15.** MALDI-TOF spectrum of compound **7**.

## 2.6. Synthesis of compound **13**

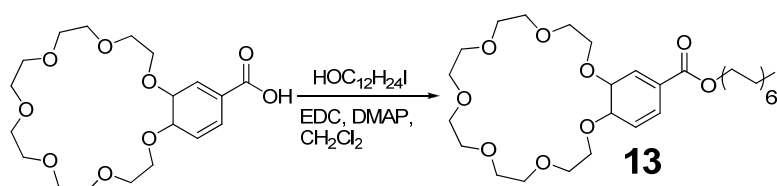

Benzo-21-crown-7 acid (3.50 g, 8.75 mmol), 12-iodododecanol (2.50 g, 8.00 mmol), EDC·HCl (3.00 g, 15.7 mmol) and DMAP (300 mg, 2.45 mmol) in CH<sub>2</sub>Cl<sub>2</sub> (50 mL) were placed in a 100 mL round-bottom flask and the mixture was stirred for 24 hours at room temperature. After the reaction was complete, the solvent was extracted with H<sub>2</sub>O/CH<sub>2</sub>Cl<sub>2</sub>. The combined organic extracts were removed with a rotary evaporator and the residue was purified by flash column chromatography (ethyl acetate as the eluent) to provide compound **13** as a colorless oil (3.40 g, 61%). The <sup>1</sup>H NMR spectrum of compound **13** is shown in Figure S16. <sup>1</sup>H NMR (300 MHz, CDCl<sub>3</sub>, room temperature) δ (ppm): δ 7.66 (dd, *J* = 8.4, 2.0 Hz, 1H), 7.55 (d, *J* = 2.0 Hz, 1H), 6.87 (d, *J* = 8.5 Hz, 1H), 4.27 (t, *J* = 6.7 Hz, 2H), 4.24–4.17 (m, 4H), 3.97–3.90 (m, 4H), 3.84–3.78 (m, 4H), 3.78–3.71 (m, 4H), 3.71–3.63 (m, 8H), 3.19 (t, *J* = 7.0 Hz, 2H), 1.86–1.69 (m, 4H), 1.37 (m, 4H), 1.28 (m, 12H). The <sup>13</sup>C NMR spectrum of compound **13** is shown in Figure S17. <sup>13</sup>C NMR (75 MHz, CDCl<sub>3</sub>, room temperature) δ (ppm): 166.4, 152.8, 148.2, 123.8, 123.3, 114.6, 112.2, 71.4, 71.2, 71.1, 71.0, 70.6, 69.6, 69.5, 69.3, 69.1, 65.0, 33.6, 30.5, 29.5, 29.4, 29.3, 28.8, 28.5, 26.0. ESI-MS *m/z*: [M + H]<sup>+</sup>,

C<sub>31</sub>H<sub>52</sub>IO<sub>9</sub>, 695.26501.

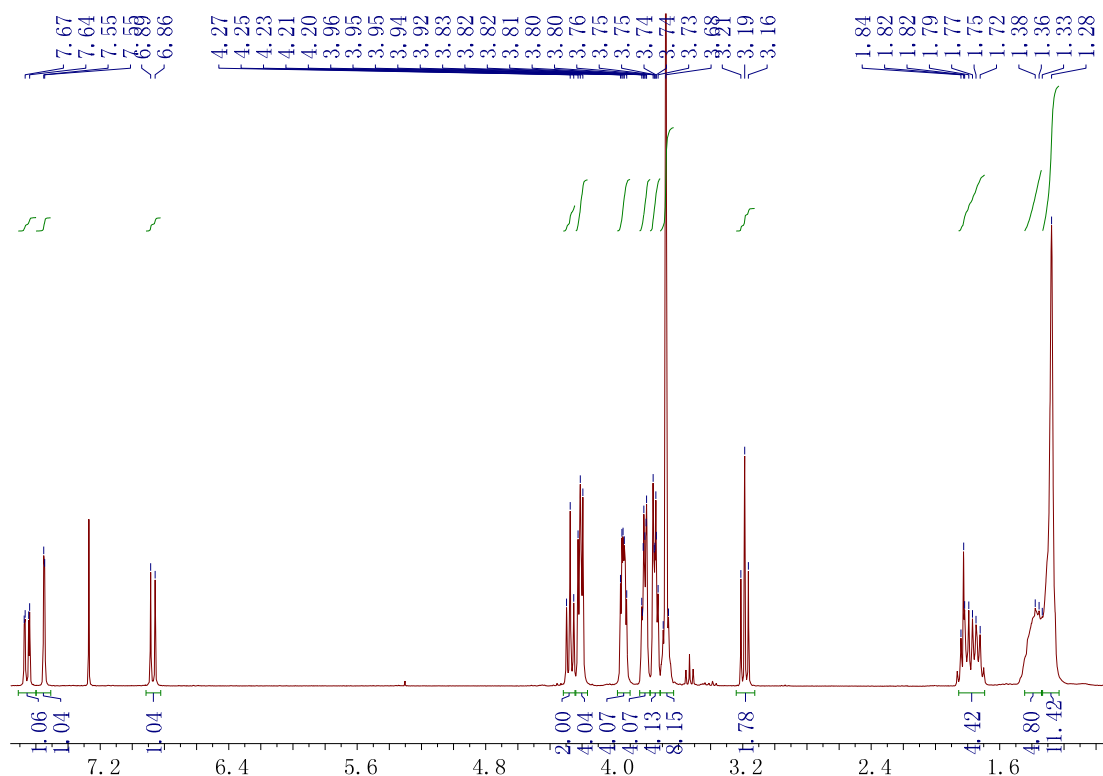

**Figure S16.** <sup>1</sup>H NMR spectrum (300 MHz, CDCl<sub>3</sub>, room temperature) of compound **13**.

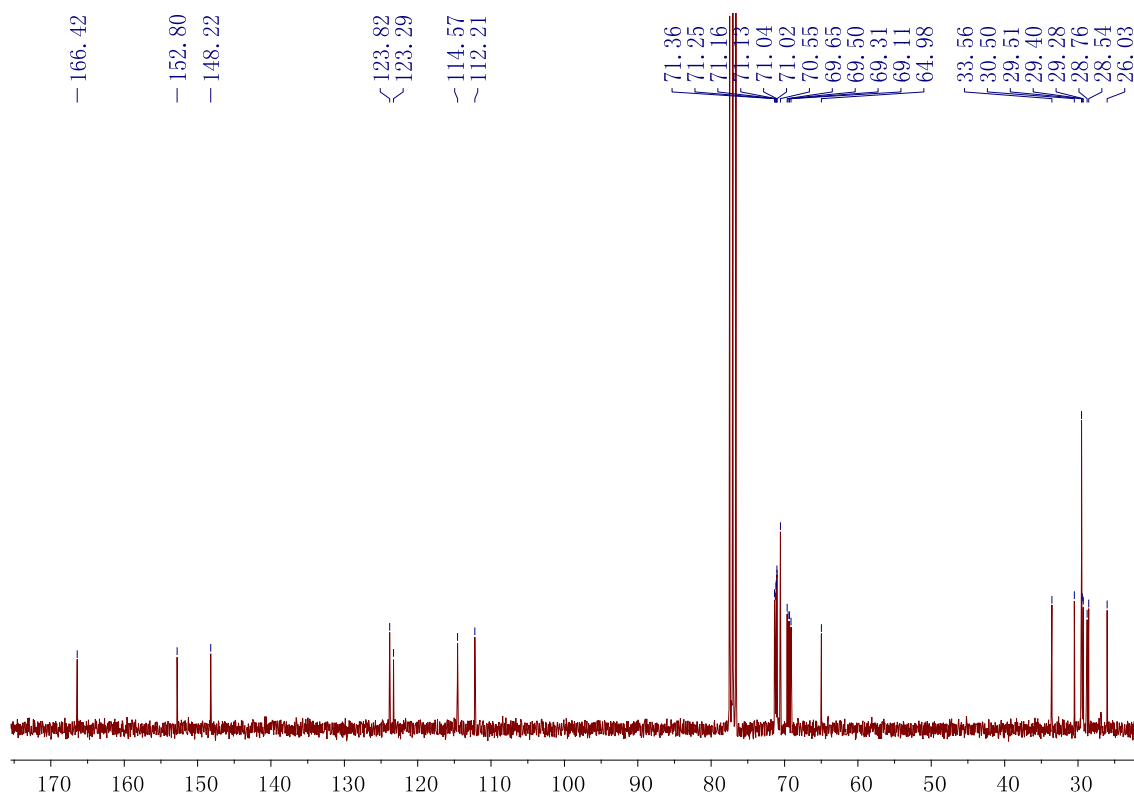

**Figure S17.** <sup>13</sup>C NMR spectrum (75 MHz, CDCl<sub>3</sub>, room temperature) of compound **13**.



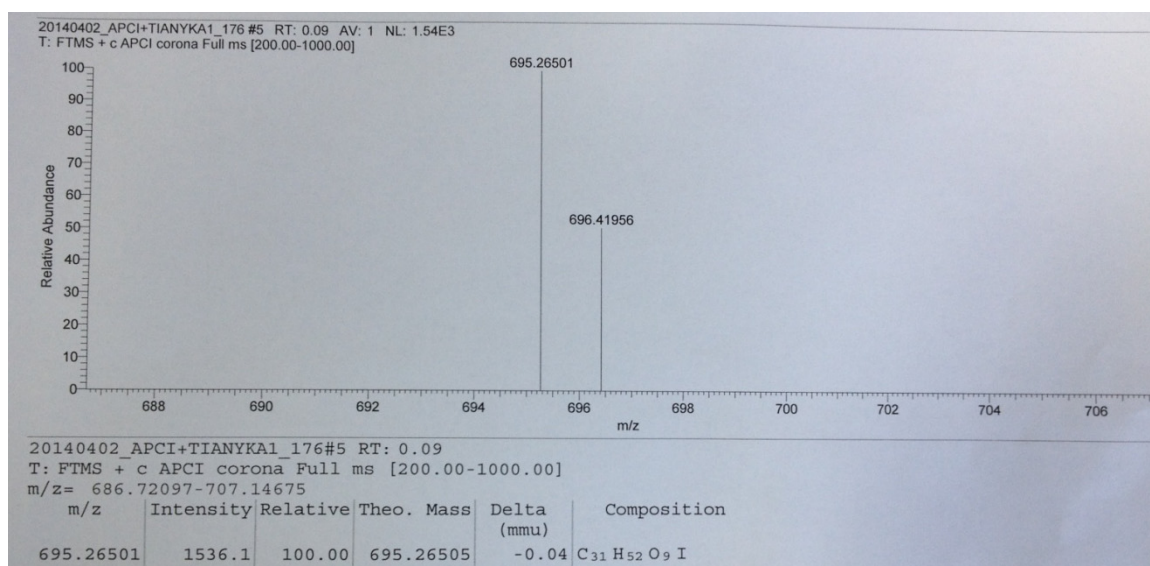

**Figure S18.** Electrospray ionization spectrum of compound **13**.

## 2.7. Synthesis of compound **14**

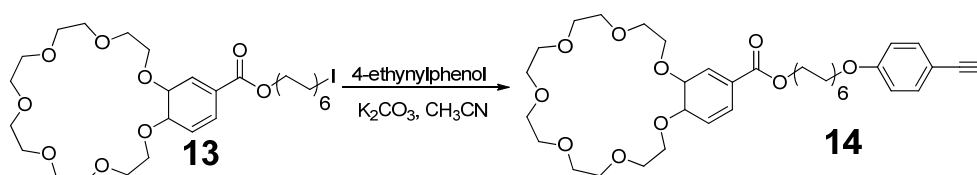

4-Ethynylphenol (0.40 g, 3.39 mmol) and  $K_2CO_3$  (0.70 g, 5.07 mmol) were placed in a 150 mL round-bottom flask. Compound **13** (1.70 g, 2.45 mmol) in  $CH_3CN$  (40 mL) was added and the resulting mixture was stirred at 90 °C for 24 hours. The solvent was evaporated under reduced pressure and the residue was extracted with  $H_2O/CH_2Cl_2$ . After the combined organic extracts were dried over anhydrous  $Na_2SO_4$  and evaporated with a rotary evaporator, the residue was purified by flash column chromatography ( $CH_3OH/CH_2Cl_2$ , 1 : 20 v/v as the eluent) to afford compound **14** as a yellow oil (1.40 g, 84%). The  $^1H$  NMR spectrum of compound **14** is shown in Figure S19.  $^1H$  NMR (300 MHz,  $CDCl_3$ , room temperature)  $\delta$  (ppm): 7.65 (m, 1H), 7.55 (d,  $J = 2.0$  Hz, 1H), 7.45–7.37 (m, 2H), 6.91–6.79 (m, 3H), 4.27 (t,  $J = 6.7$  Hz, 2H), 4.24–4.16 (m, 4H), 3.92–3.97 (m, 6H), 3.84–3.78 (m, 4H), 3.76–3.72 (m, 4H), 3.71–3.63 (m, 8H), 2.99 (s, 1H), 1.76 (m, 4H), 1.49–1.37 (m, 4H), 1.29 (m, 12H). The  $^{13}C$  NMR spectrum of compound **14** is shown in Figure S20.  $^{13}C$  NMR (75 MHz,  $CDCl_3$ , room temperature)  $\delta$  (ppm): 166.4, 159.5, 152.8, 148.2, 133.6, 123.8, 123.3, 114.6, 114.4, 113.8, 112.2, 83.8, 75.7, 71.3, 71.2, 71.1, 71.0, 69.6, 69.5, 69.3, 69.1, 68.0, 65.0, 29.5, 29.4, 29.3, 29.2, 28.8, 26.0. ESI-MS  $m/z$ :  $[M + H]^+$ ,  $C_{39}H_{57}O_{10}$ , 685.39453.



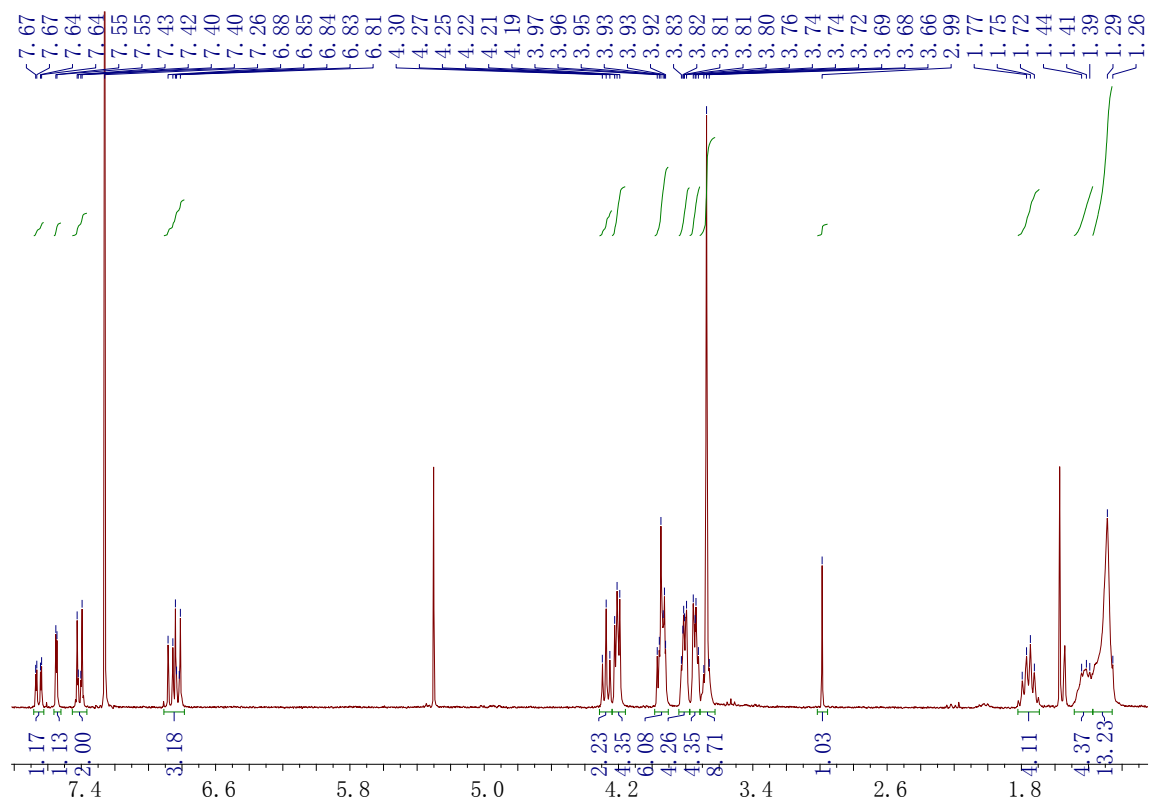

**Figure S19.**  $^1\text{H}$  NMR spectrum (300 MHz,  $\text{CDCl}_3$ , room temperature) of compound **14**.

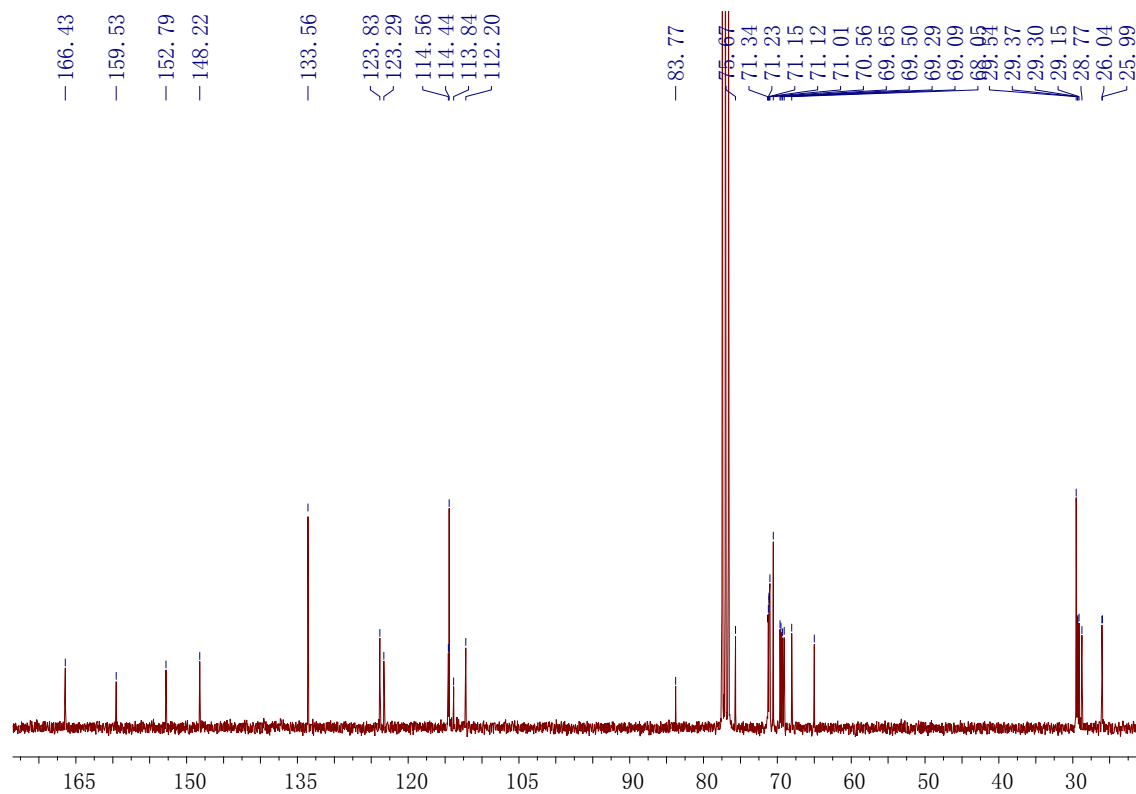

**Figure S20.**  $^{13}\text{C}$  NMR spectrum (75 MHz,  $\text{CDCl}_3$ , room temperature) of compound **14**.

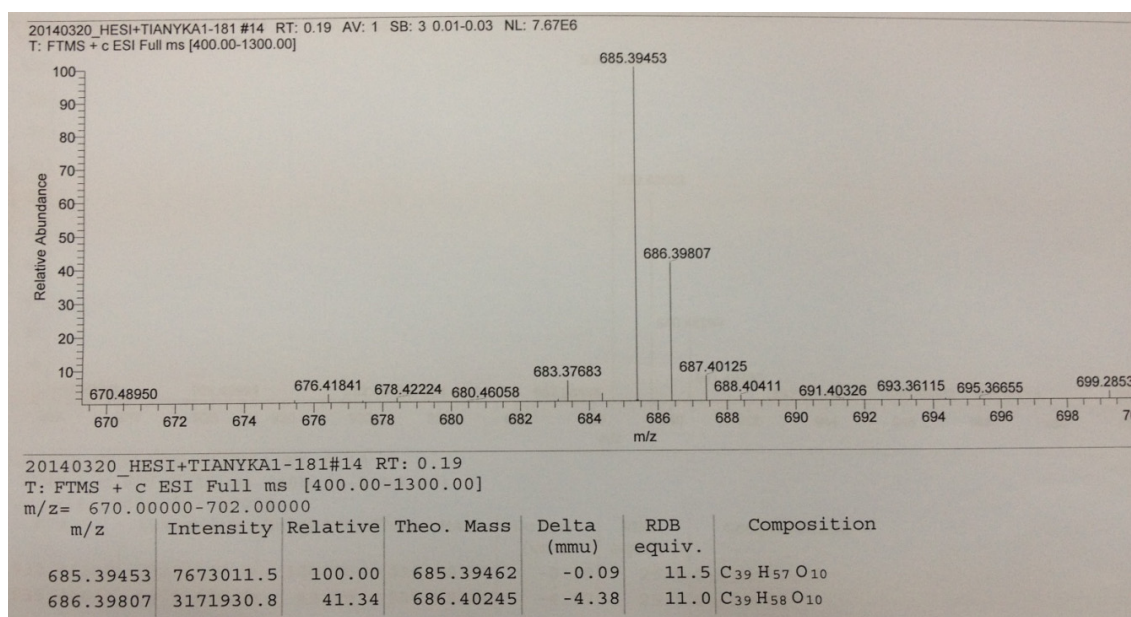

**Figure S21.** Electrospray ionization spectrum of compound **14**.

## 2.8. Synthesis of monomer **2**

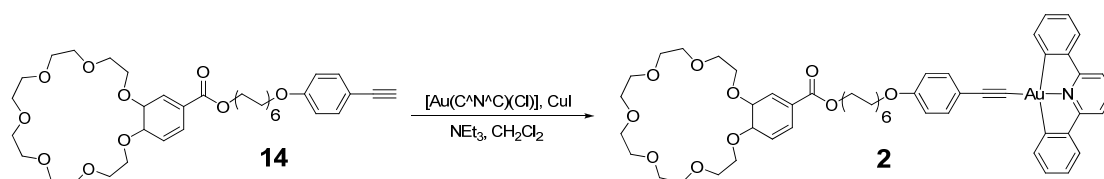

Compound **14** (310 mg, 0.45 mmol), [Au(C<sup>N</sup>C)(Cl)] (210 mg, 0.46 mmol), CuI (20.0 mg, 0.10 mmol) and NEt<sub>3</sub> (2 mL) in 30 mL CH<sub>2</sub>Cl<sub>2</sub> were stirred at room temperature for 48 hours under nitrogen atmosphere. After the reaction was complete, the solvent was evaporated under reduced pressure and the residue was purified by flash column chromatograph (CH<sub>2</sub>Cl<sub>2</sub>/CH<sub>3</sub>OH, 100 : 1 v/v as the eluent) to afford compound **2** as a yellow oil (420 mg, 84%). The <sup>1</sup>H NMR spectrum of compound **2** is shown in Figure S22. <sup>1</sup>H NMR (300 MHz, CDCl<sub>3</sub>, room temperature) δ (ppm): 8.08 (d, *J* = 7.2 Hz, 2H), 7.84 (t, *J* = 8.0 Hz, 1H), 7.65 (m, 1H), 7.54 (t, *J* = 7.8 Hz, 5H), 7.45 (d, *J* = 8.0 Hz, 2H), 7.38 (t, *J* = 7.3 Hz, 2H), 7.23 (m, 2H), 6.87 (m, 3H), 4.28 (t, *J* = 6.7 Hz, 2H), 4.24–4.17 (m, 4H), 3.99 (m, 2H), 3.96–3.90 (m, 4H), 3.84–3.78 (m, 4H), 3.78–3.71 (m, 4H), 3.67 (m, 8H), 1.84–1.60 (m, 6H), 1.30 (s, 14H). The <sup>13</sup>C NMR spectrum of compound **2** is shown in Figure S23. <sup>13</sup>C NMR (75 MHz, CDCl<sub>3</sub>, room temperature) δ (ppm): 166.9, 166.4, 164.7, 158.2, 152.8, 149.0, 148.2, 142.1, 136.5, 133.1, 131.8, 126.6, 125.2, 123.8, 123.3, 126.6, 125.2, 123.8, 123.3, 118.8, 116.8, 114.5, 114.3, 112.2, 100.5, 89.4, 71.3, 71.2, 71.1, 71.0, 70.6, 69.6, 69.5, 69.3, 69.1, 68.0, 65.0, 29.7, 29.6, 29.4, 29.3, 28.8, 26.1. ESI-MS *m/z*: [M + K]<sup>+</sup>, C<sub>56</sub>H<sub>66</sub>AuKNO<sub>10</sub>, 1148.5.

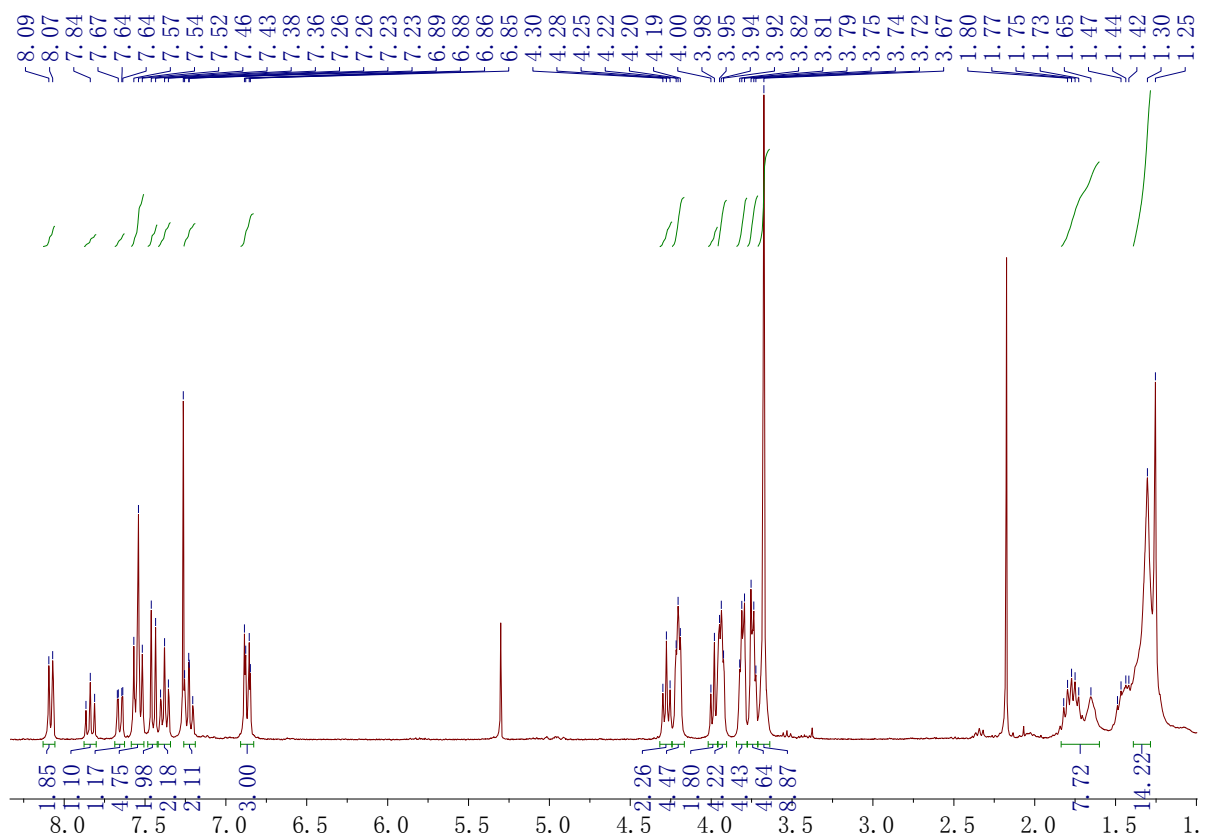

**Figure S22.**  $^1\text{H}$  NMR spectrum (300 MHz,  $\text{CDCl}_3$ , room temperature) of monomer **2**.

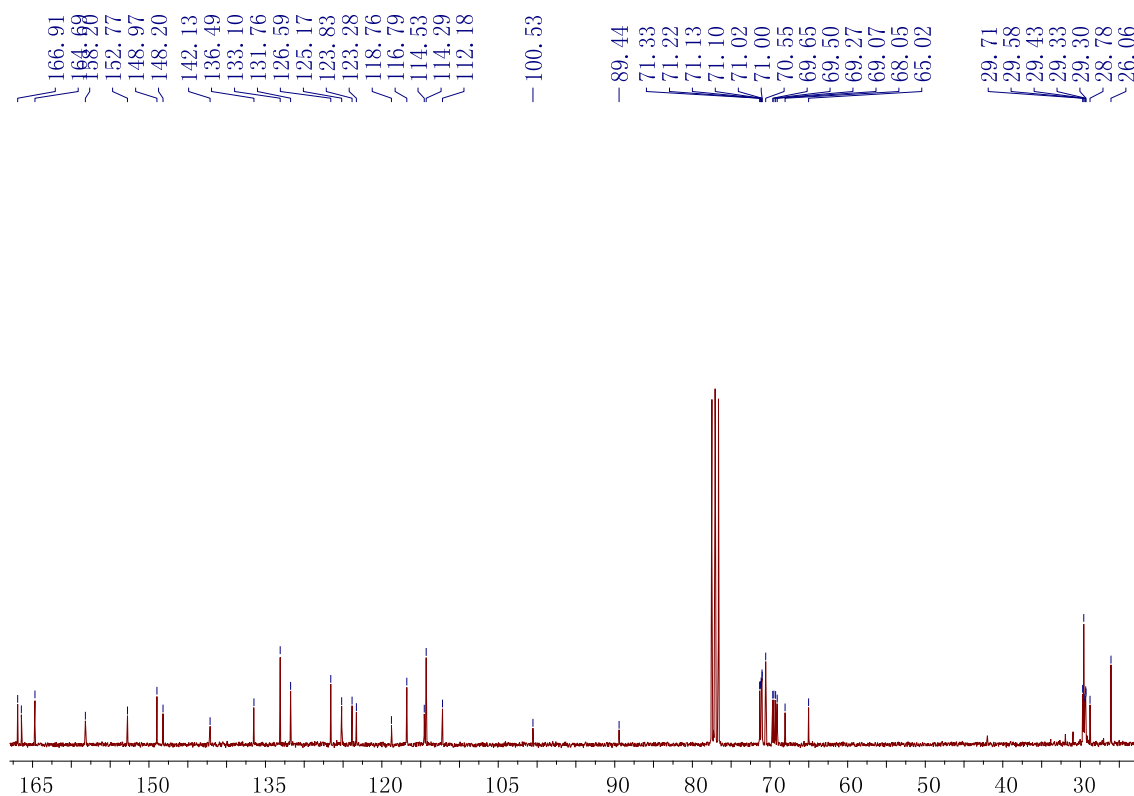

**Figure S23.**  $^{13}\text{C}$  NMR spectrum (75 MHz,  $\text{CDCl}_3$ , room temperature) of monomer **2**.

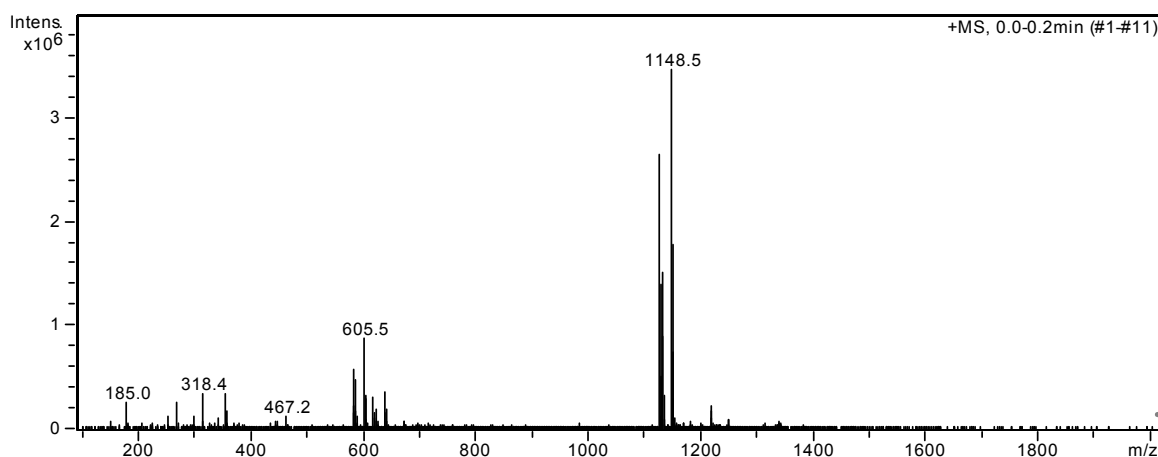

**Figure S24.** Electrospray ionization spectrum of monomer **2**.

## 2.9. Synthesis of compound **15**

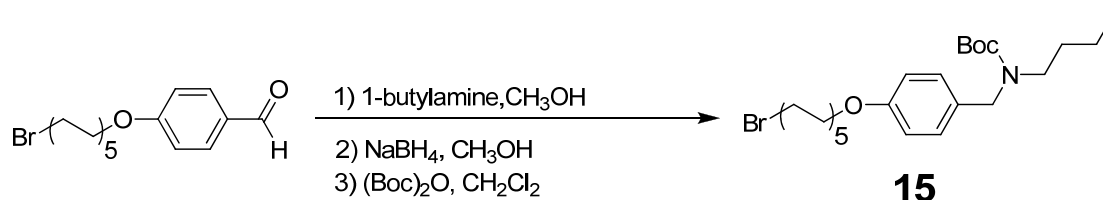

A solution of 4-((10-bromodecyl)oxy)benzaldehyde (10.0 g, 29.3 mmol) and 1-butylamine (6.42 g, 88.0 mmol) in MeOH (100 mL) was stirred at room temperature overnight. Then NaBH<sub>4</sub> (0.91 g) was added and stirred at room temperature for 6 hours. After the quench of reaction by addition of water, the resulting solution was extracted with H<sub>2</sub>O/CH<sub>2</sub>Cl<sub>2</sub>. The organic extracts was dried over anhydrous Na<sub>2</sub>SO<sub>4</sub> and evaporated to afford a crude product. The mixture of the crude product, di-*tert*-butyl dicarbonate (6.40 g, 29.3 mmol) and Et<sub>3</sub>N (3.00 g, 29.6 mmol) in MeOH (100 mL) was stirred at room temperature overnight. The solvent was removed and the residue was purified by flash column chromatography (petroleum ether/CH<sub>2</sub>Cl<sub>2</sub>, 5 : 1 v/v as the eluent) to afford **15** as a colorless oil (9.27 g, 63%). The <sup>1</sup>H NMR spectrum of compound **15** is shown in Figure S25. <sup>1</sup>H NMR (300 MHz, CDCl<sub>3</sub>, room temperature) δ 7.13 (br, 2H), 6.82 (d, *J* = 8.6 Hz, 2H), 4.34 (s, 2H), 3.92 (t, *J* = 6.5 Hz, 2H), 3.39 (t, *J* = 6.9 Hz, 2H), 3.23–3.01 (br, 2H), 1.92–1.70 (m, 4H), 1.44 (m, 12H), 1.35–1.19 (m, 11H), 0.89 (m, 3H). The <sup>13</sup>C NMR spectrum of compound **15** is shown in Figure S26. <sup>13</sup>C NMR (75 MHz, CDCl<sub>3</sub>, room temperature) δ (ppm): 158.3, 130.5, 129.0, 128.4, 79.4, 68.0, 49.7, 49.1, 46.0, 34.0, 32.8, 30.1, 29.7, 29.4, 29.3, 28.7, 28.5, 28.2, 26.0, 20.0, 13.9. ESI–MS *m/z*: [M + H]<sup>+</sup>, C<sub>26</sub>H<sub>45</sub>O<sub>3</sub>NBr, 498.25787.

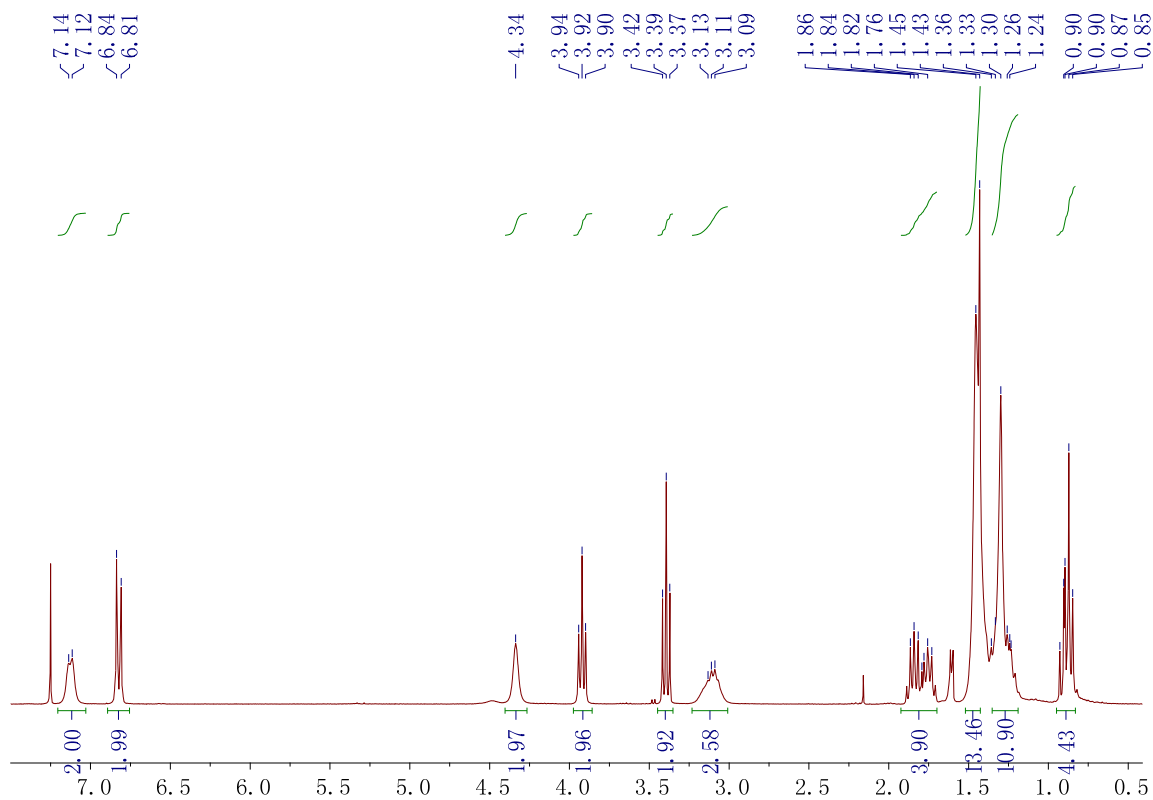

**Figure S25.** <sup>1</sup>H NMR spectrum (300 MHz, CDCl<sub>3</sub>, room temperature) of compound **15**.

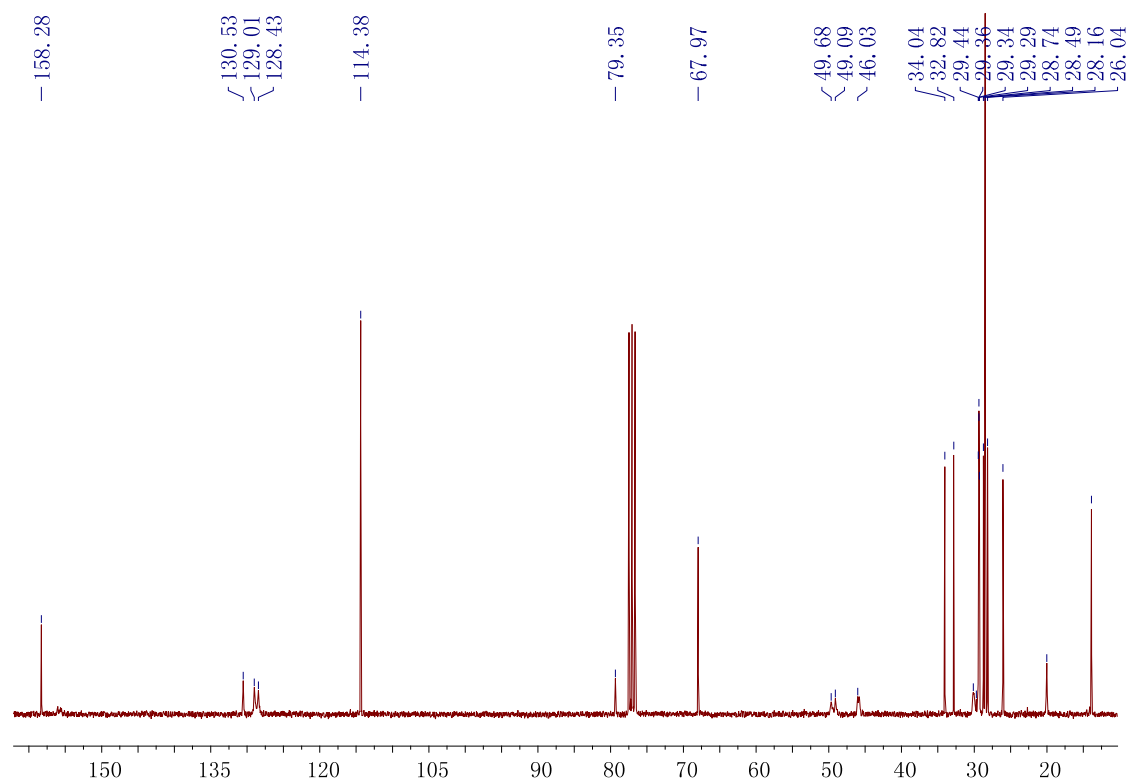

**Figure S26.** <sup>13</sup>C NMR spectrum (75 MHz, CDCl<sub>3</sub>, room temperature) of compound **15**.

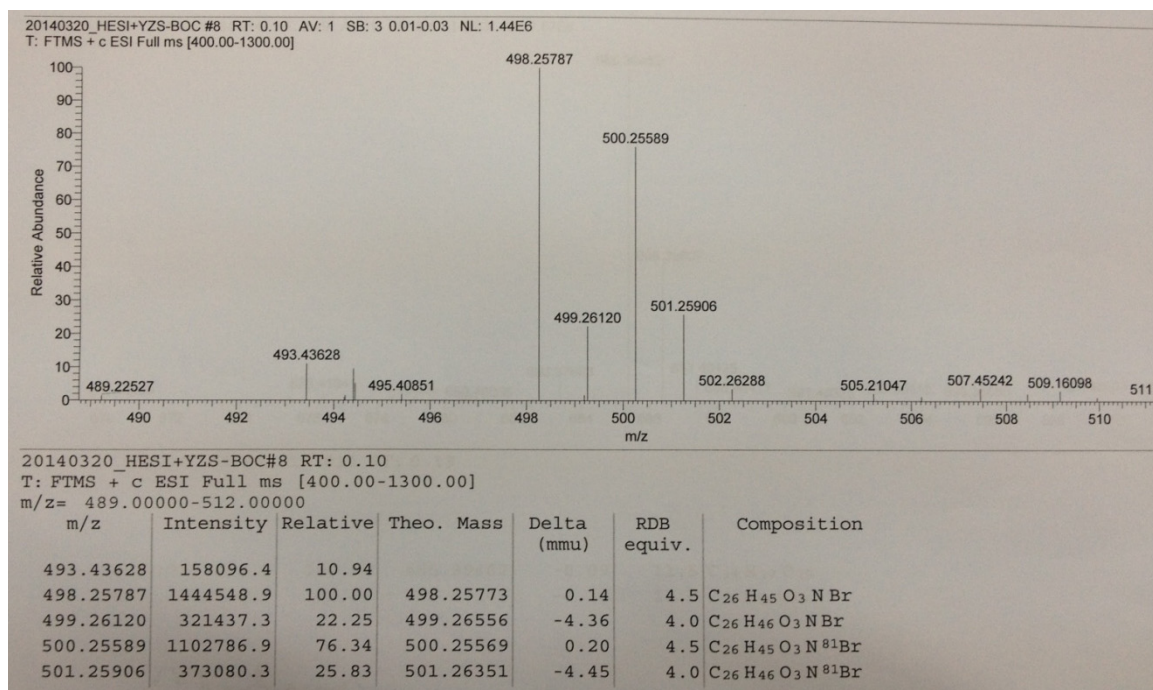

**Figure S27.** Electrospray ionization spectrum of compound **15**.

## 2.10. Synthesis of compound **16**

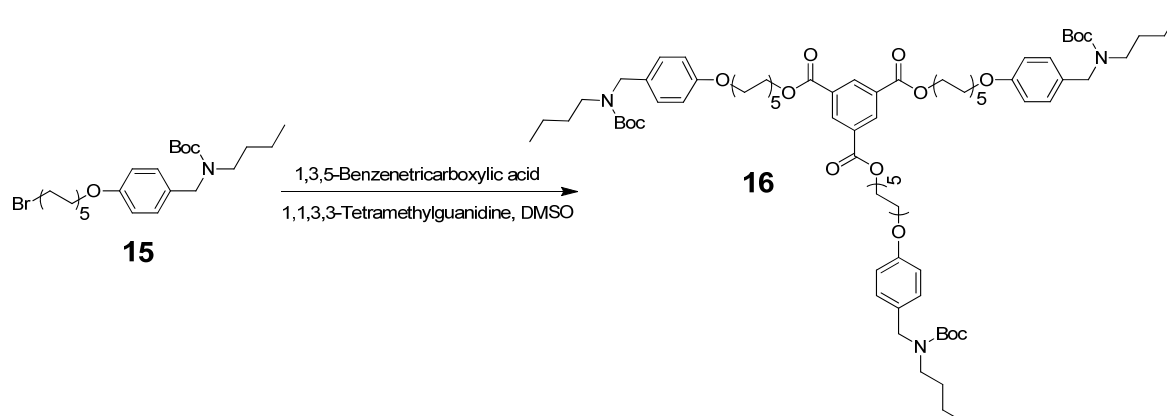

Compound **15** (5.00 g, 10.0 mmol), 1,3,5-benzenetricarboxylic acid (0.53 g, 2.50 mmol) and 1,1,3,3-tetramethylguanidine (0.87 g, 7.55 mmol) in 50 mL DMSO were stirred at room temperature for 48 hours.<sup>[S7]</sup> After the reaction was complete, the solvent was extracted with H<sub>2</sub>O/CH<sub>2</sub>Cl<sub>2</sub>. The organic extracts were dried over anhydrous Na<sub>2</sub>SO<sub>4</sub> and evaporated with a rotary evaporator. The residue was purified by flash column chromatography (petroleum ether/CH<sub>2</sub>Cl<sub>2</sub>, 2 : 1 v/v as the eluent) to afford compound **16** as a colorless oil (9.27 g, 63%). The <sup>1</sup>H NMR spectrum of compound **16** is shown in Figure S28. <sup>1</sup>H NMR (300 MHz, CDCl<sub>3</sub>, room temperature) δ 8.84 (s, 3H), 7.13 (br, 6H), 6.82 (d, *J* = 8.6 Hz, 6H), 4.36 (t, *J* = 6.7 Hz, 12H), 3.92 (t, *J* = 6.5 Hz, 6H), 3.09 (br, 6H), 1.78 (m, 12H), 1.46 (m, 42H), 1.38–1.21 (m, 33H), 0.88 (t, *J* = 7.3 Hz, 9H). The <sup>13</sup>C NMR spectrum of compound **16** is shown in Figure S29. <sup>13</sup>C NMR (75 MHz, CDCl<sub>3</sub>, room temperature) δ (ppm): 165.1, 158.3, 134.4, 131.5,

130.5, 129.0, 128.4, 114.4, 79.3, 68.0, 65.8, 49.7, 45.8, 30.1, 29.7, 29.5, 29.4, 29.3, 28.7, 28.5, 26.1, 26.0, 20.0, 13.9. ESI-MS  $m/z$ :  $[M + H]^+$ ,  $C_{87}H_{136}O_{15}N_3$ , 1462.99634.

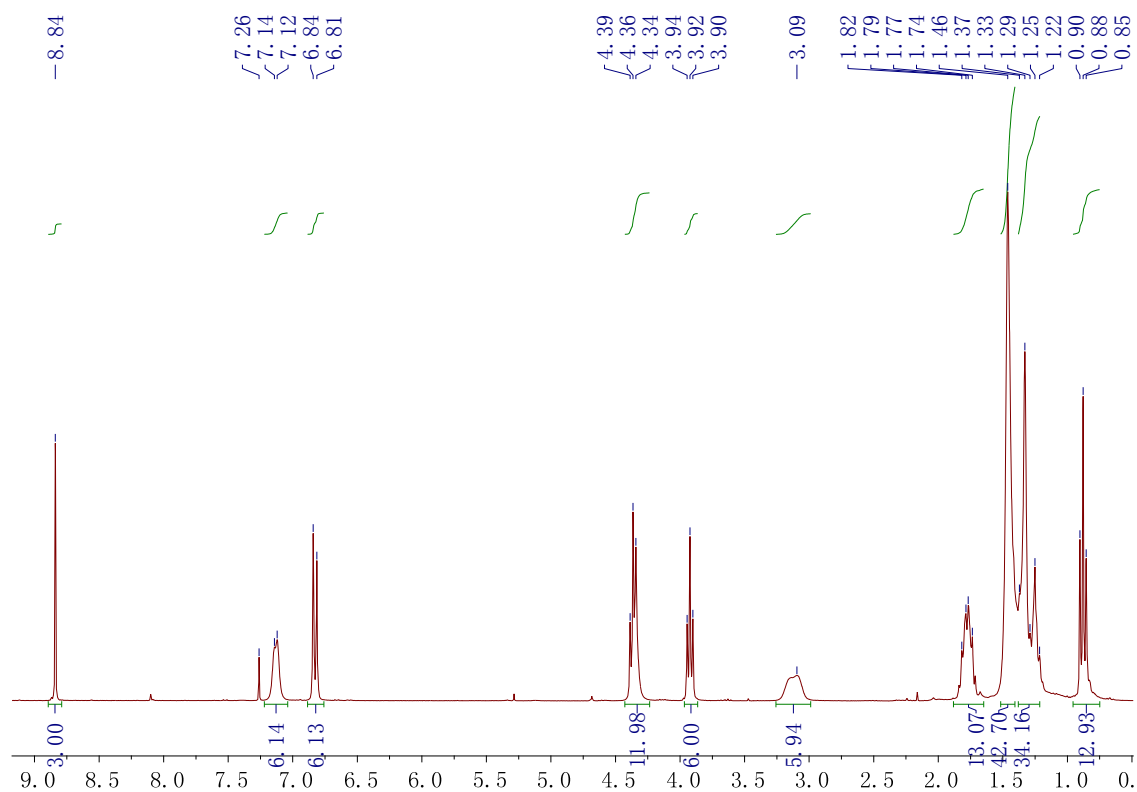

**Figure S28.** <sup>1</sup>H NMR spectrum (300 MHz, CDCl<sub>3</sub>, room temperature) of compound 16.

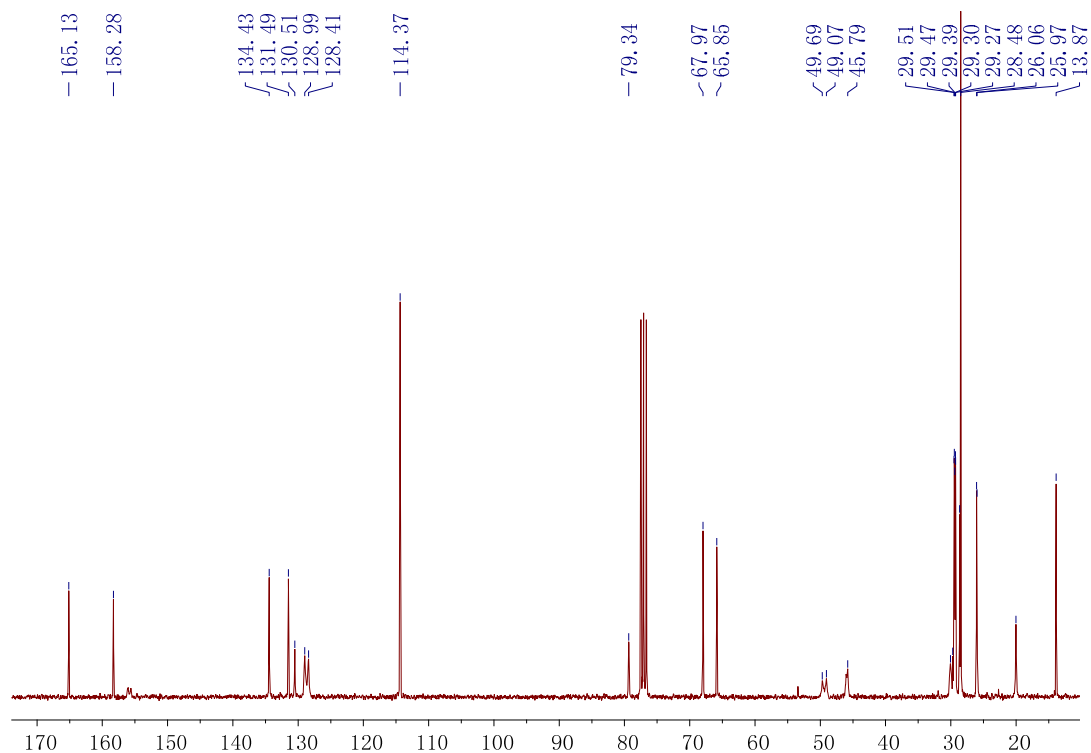

**Figure S29.** <sup>13</sup>C NMR spectrum (75 MHz, CDCl<sub>3</sub>, room temperature) of compound 16.



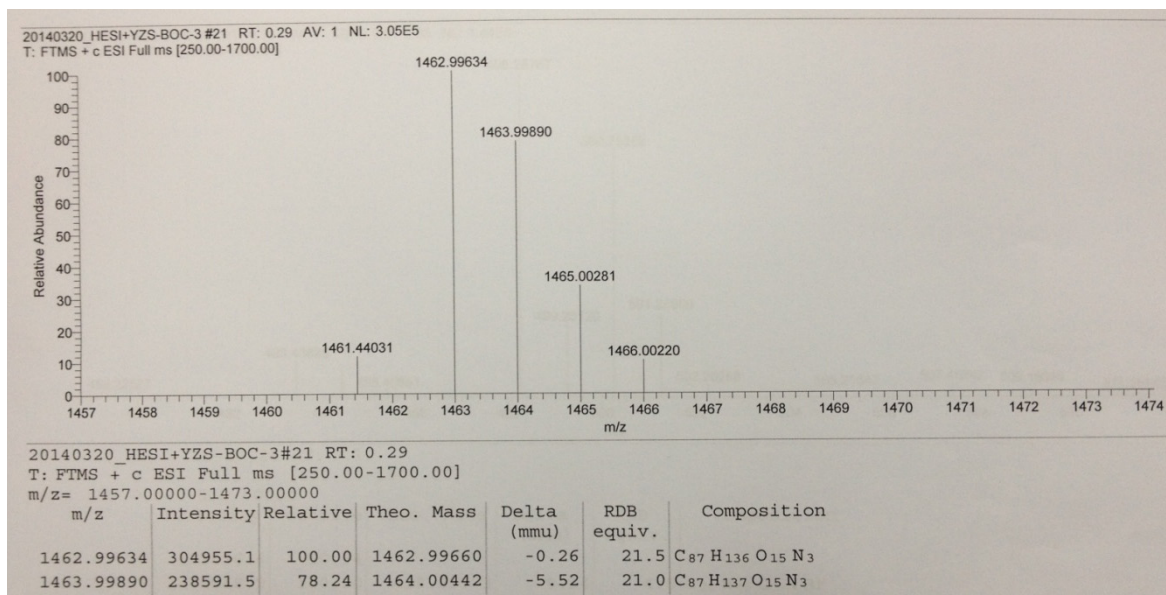

**Figure S30.** Electrospray ionization spectrum of compound **16**.

### 2.11. Synthesis of monomer **3**

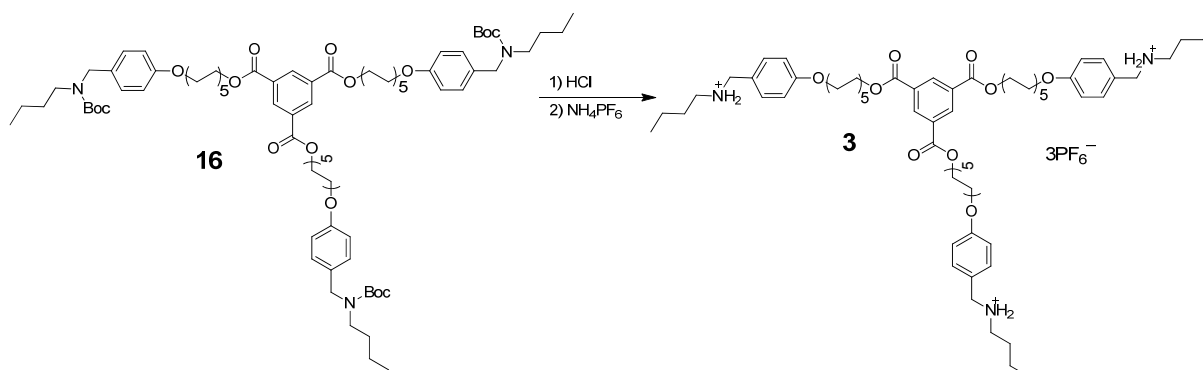

Compound **16** (2.00 g, 1.37 mmol) was dissolved in 10% HCl/ethyl acetate (100 mL) and stirred overnight. After the reaction, the white solid was filtered, washed with ethyl acetate thoroughly, and dissolved in water/acetone (200 mL). The saturated aqueous solution of  $\text{NH}_4\text{PF}_6$  was added and stirred at room temperature for 3 hours. Then acetone was evaporated with a rotary evaporator to afford a white precipitate, which was filtered off and washed with deionized water to afford monomer **3** as a white solid (1.45 g, 66%). Mp: 196.3–197.5 °C. The  $^1\text{H}$  NMR spectrum of compound **3** is shown in Figure S31.  $^1\text{H}$  NMR (300 MHz,  $\text{CD}_3\text{CN}$ , room temperature)  $\delta$  8.66 (s, 3H), 7.28 (d,  $J$  = 8.6 Hz, 6H), 6.88 (d,  $J$  = 8.2 Hz, 6H), 4.29 (t,  $J$  = 6.3 Hz, 6H), 3.99 (s, 6H), 3.91 (t,  $J$  = 6.6 Hz, 6H), 2.96–2.85 (m, 6H), 1.69 (m, 12H), 1.53 (m, 6H), 1.44–1.17 (m, 42H), 0.87 (t,  $J$  = 7.3 Hz, 9H). The  $^{13}\text{C}$  NMR spectrum of compound **3** is shown in Figure S32.  $^{13}\text{C}$  NMR (75 MHz,  $\text{CD}_3\text{CN}$ , room temperature)  $\delta$  (ppm): 164.3, 159.8, 133.3, 131.4, 131.3, 122.0, 114.4, 67.6, 65.4, 50.7, 47.0, 28.9, 28.7, 28.6, 28.0, 27.2,



25.4, 19.0, 12.4.  $[M + Na]^+$ ,  $C_{72}H_{114}O_9N_3NaP_3$ , 1622.73828.

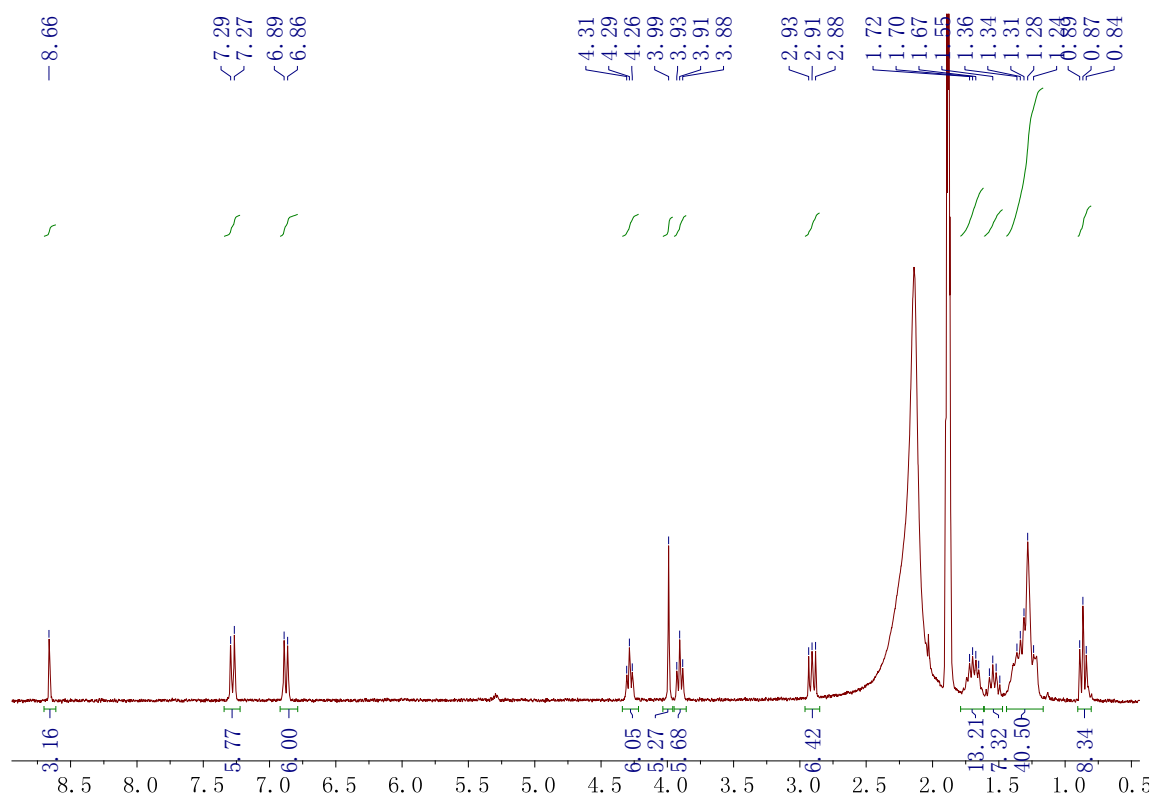

**Figure S31.**  $^1H$  NMR spectrum (300 MHz,  $CD_3CN$ , room temperature) of compound **3**.

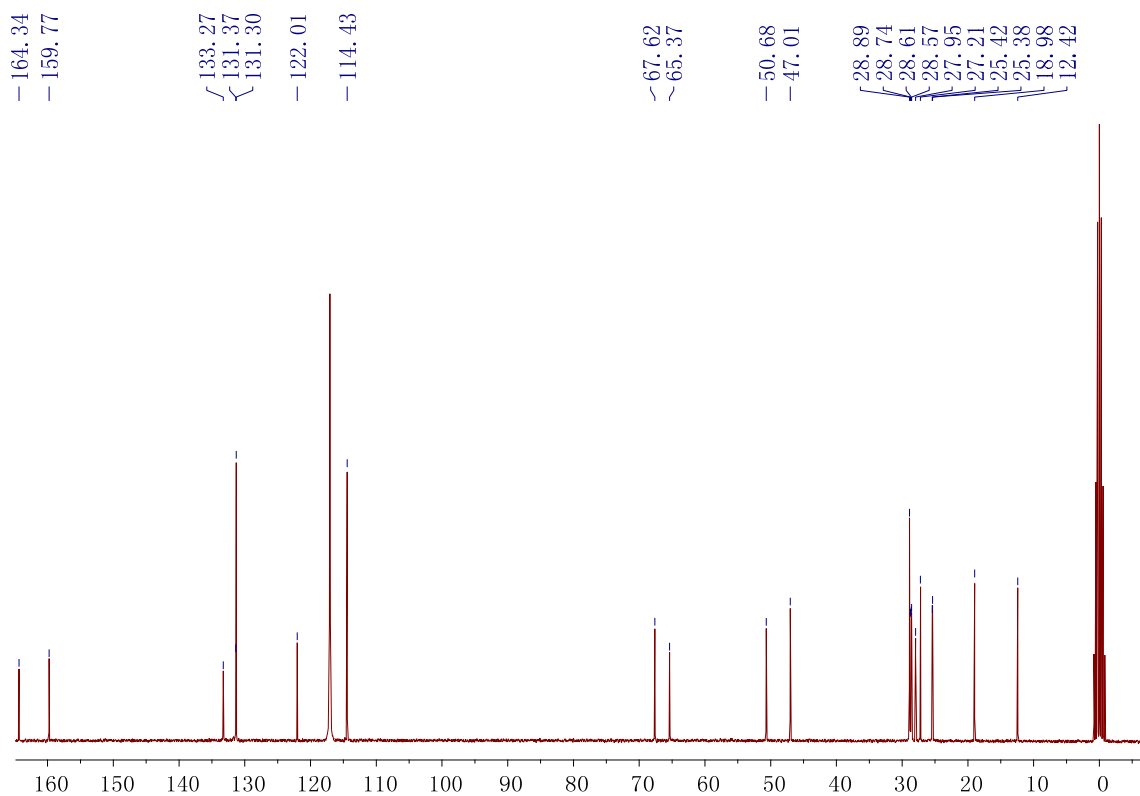

**Figure S32.**  $^{13}C$  NMR spectrum (75 MHz,  $CD_3CN$ , room temperature) of compound **3**.

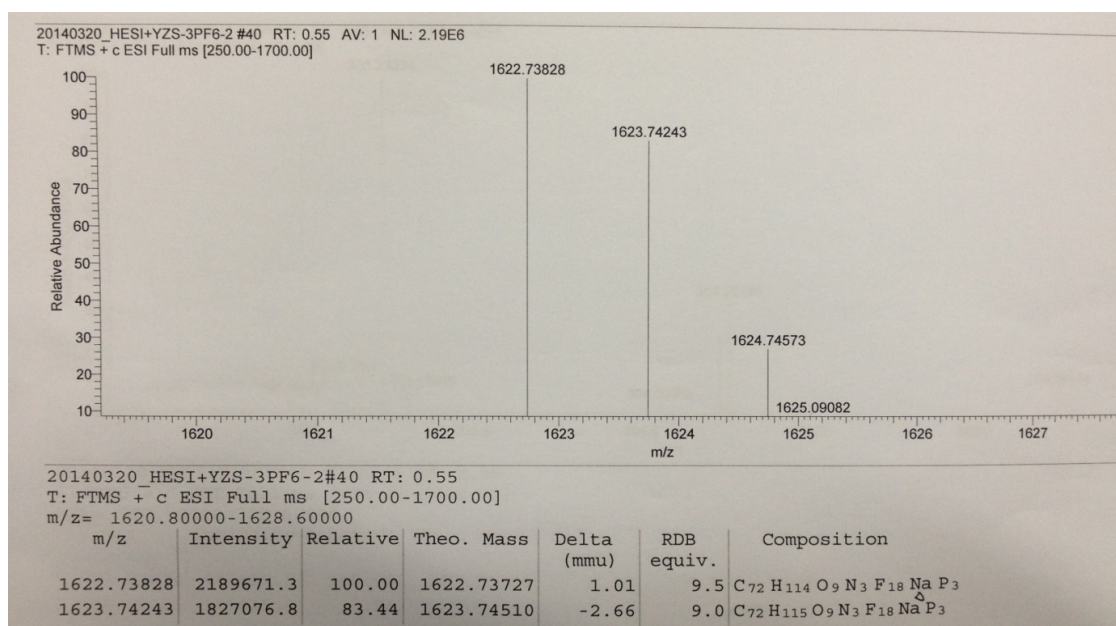

**Figure S33.** Electrospray ionization spectrum of compound **3**.

---

### 3. UV/Vis titration between **6** and pyrene

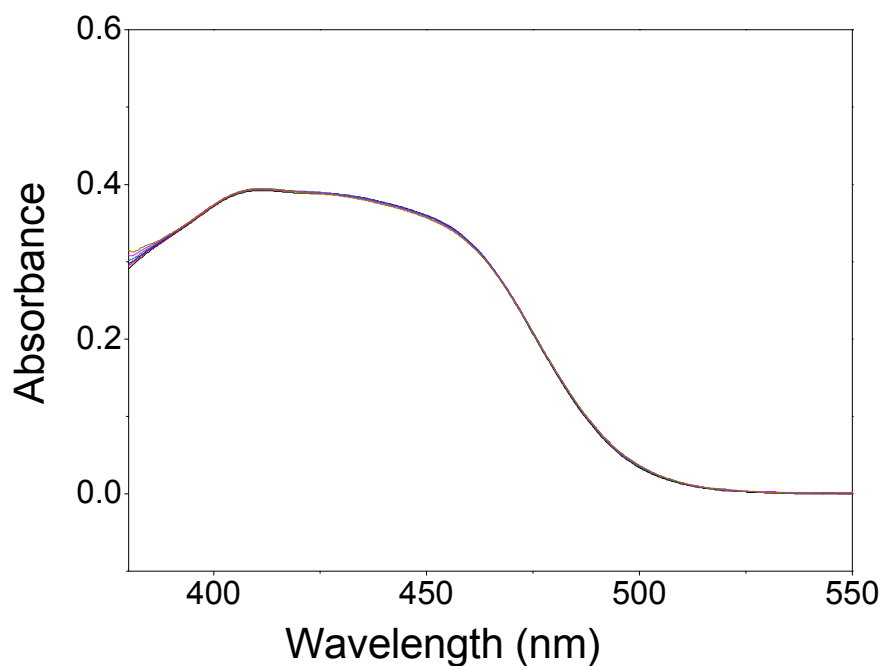

**Figure S34.** UV/Vis absorption spectra change upon stepwise addition of pyrene to monomer **6** at  $5.00 \times 10^{-5}$  M in  $\text{CHCl}_3/\text{CH}_3\text{CN}$  (2/1, v/v). The weak binding affinity for **6**/pyrene is manifested by the very slight absorption changes in UV/Vis spectra. Therefore, the bis-alkynylplatinum(II) terpyridine molecular tweezer/pyrene recognition motif is not a suitable candidate for the fabrication of supramolecular hyperbranched polymers.

#### 4. $^1\text{H}$ NMR titration between **6** and **7**

$^1\text{H}$  NMR titration experiments were performed between the monotopic compounds **6** and **7**, for which the initial concentration of compound **7** was kept constant at 5.00 mM while concentration of compound **6** was systematically varied (Figure S35). Based on the molar ratio plot (Figure 1a in the maintext), the complexation stoichiometry between compound **6** and compound **7** is determined to be 1 : 1 at room temperature.

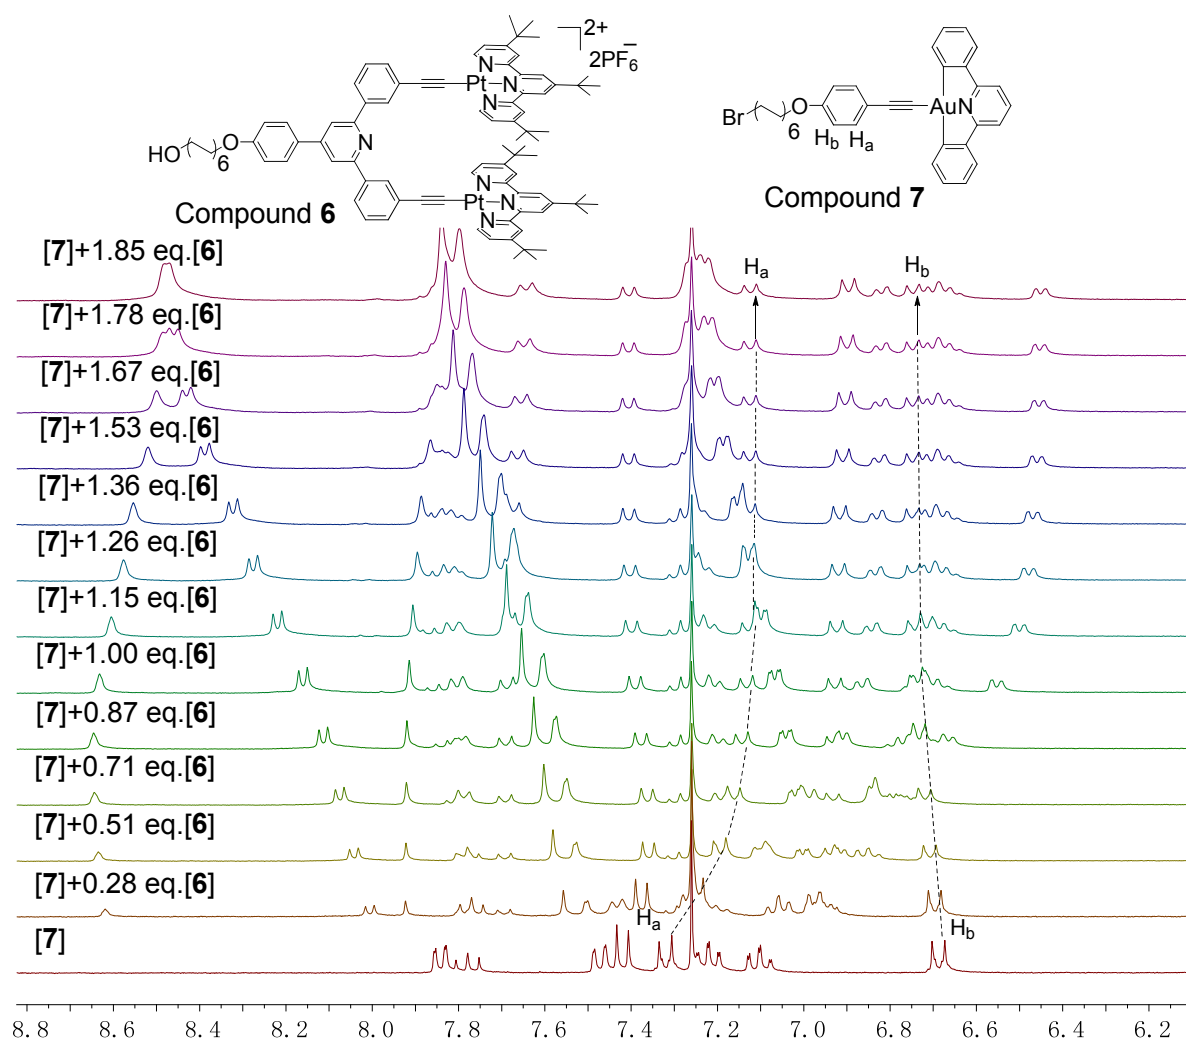

**Figure S35.**  $^1\text{H}$  NMR titration spectra (300 MHz,  $\text{CDCl}_3/\text{CD}_3\text{CN}$  (2/1, v/v), room temperature) of compound **7** at the concentration of 5.00 mM upon stepwise addition of compound **6**.

## 5. UV/Vis titration experiments for complexes 6/2 and 1/2

Progressive addition of **2** to the tweezer-containing compounds such as **1** and **6** led to a gradual decrease of the intensity for MLCT/LLCT absorption bands in UV/Vis spectra (Figure S36–37). Hence, treatment of the collected absorbance data at 460 nm ( $A$ ) vs the concentration of guest added ( $C_A$ ) with a non-linear least-squares curve-fitting equation affords the association constants. Specifically, for 1 : 1 host/guest complexation, binding constants are calculated according to the following equation:<sup>[S8]</sup>

$$A = A_0 + \frac{A_{\text{lim}} - A_0}{2C_0} \left[ C_0 + C_A + 1/K_S - \left[ (C_0 + C_A + 1/K_S)^2 - 4C_0C_A \right]^{1/2} \right] \quad (\text{Equation S1})$$

$A_0$  and  $A$  are the absorbance of the host at a selected wavelength with and without presence of the guest, respectively,  $[C_0]$  is the total concentration of the host,  $[C_A]$  is the concentration of the guest,  $A_{\text{lim}}$  is the limiting value of absorbance with the presence of excess guest and  $K_S$  is the binding constant.

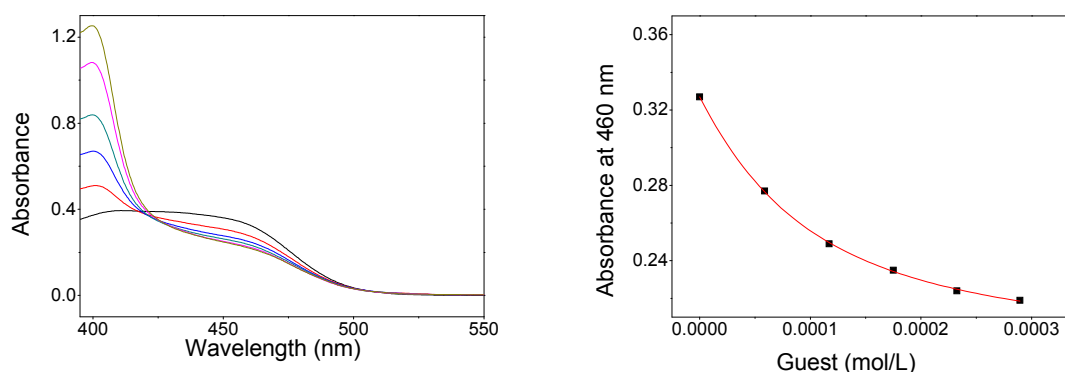

**Figure S36.** *Left:* UV/Vis absorption spectra change upon stepwise addition of **2** to **6** at  $5.00 \times 10^{-5}$  M in  $\text{CHCl}_3/\text{CH}_3\text{CN}$  (2/1, v/v); *right:* UV/Vis absorption spectra change at 460 nm. The red line was obtained from the non-linear curve-fitting.  $K_{6,2} = (1.43 \pm 0.61) \times 10^4 \text{ M}^{-1}$ .

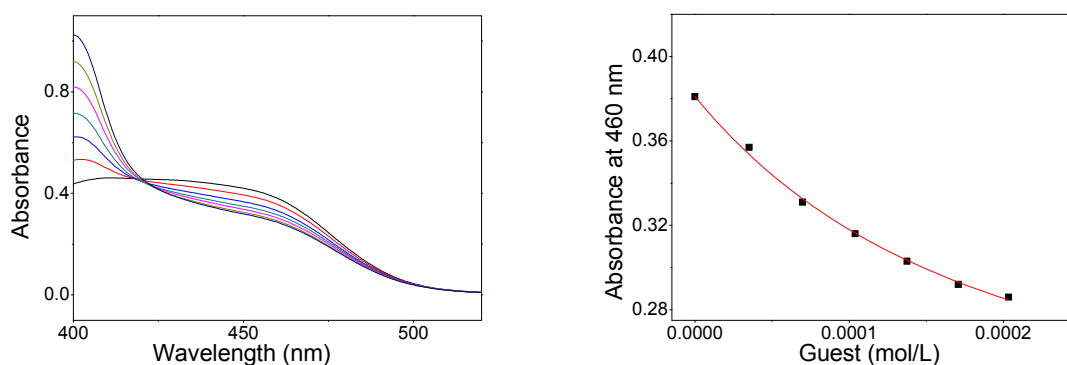

**Figure S37.** *Left:* UV/Vis absorption spectra change upon stepwise addition of **2** to **1** at  $5.00 \times 10^{-5}$  M in  $\text{CHCl}_3/\text{CH}_3\text{CN}$  (2/1, v/v); *right:* UV/Vis absorption spectra change at 460 nm. The red line was obtained from the non-linear curve-fitting.  $K_{1,2} = (6.66 \pm 1.11) \times 10^3 \text{ M}^{-1}$ .

## 6. Molecular recognition studies for the four monotopic compounds

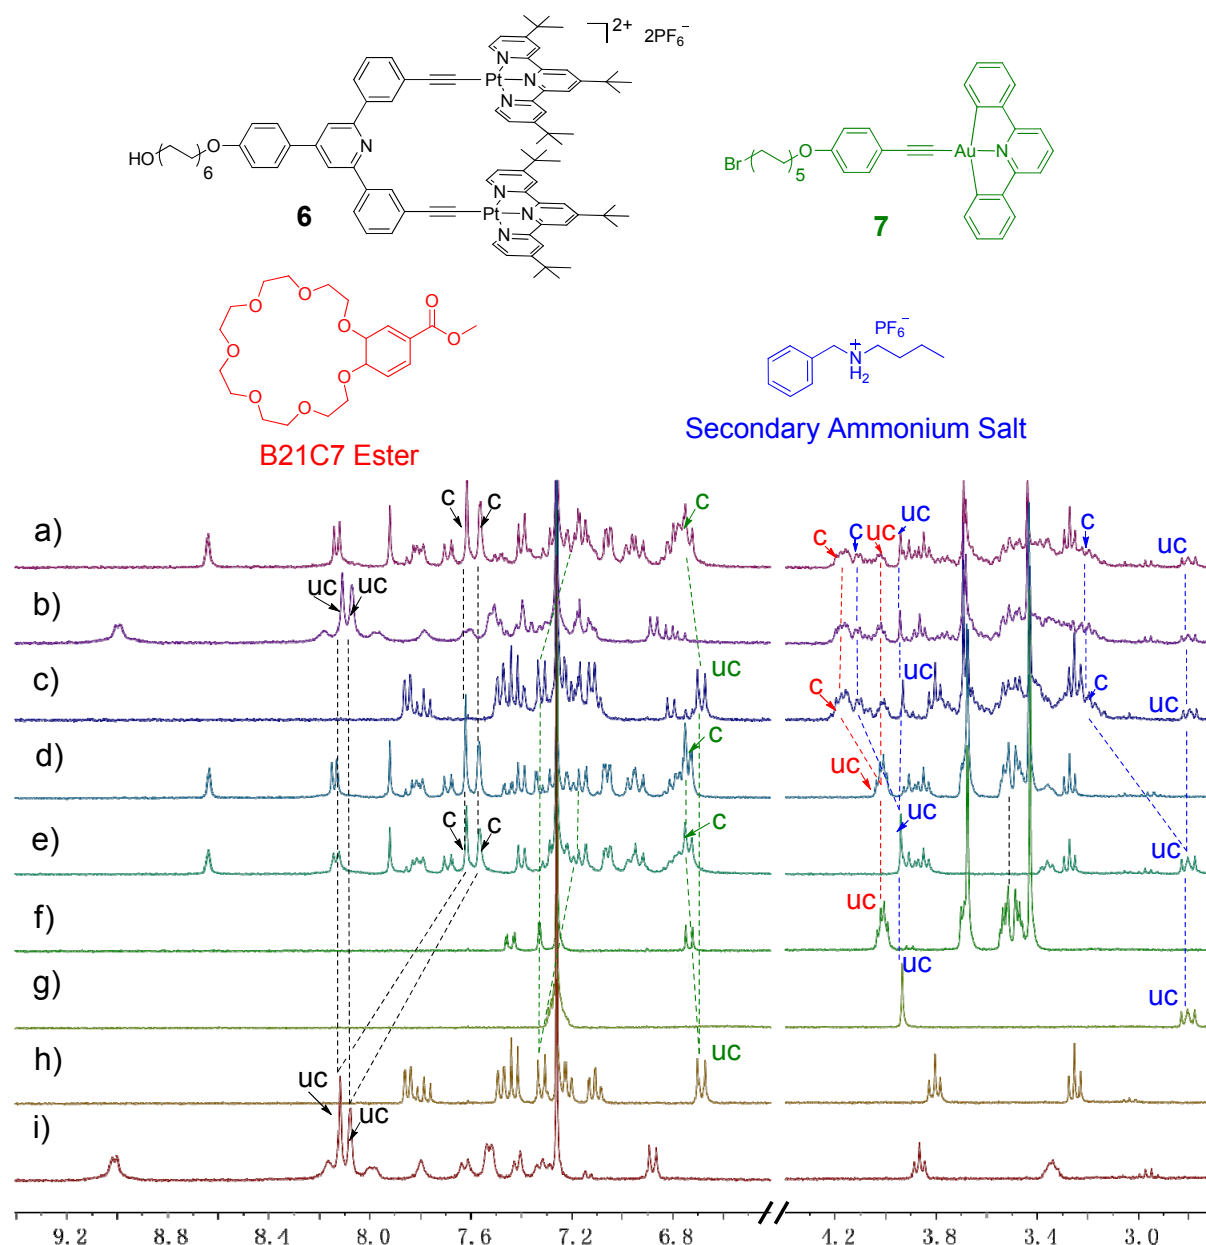

**Figure S38.** <sup>1</sup>H NMR spectra (300 MHz, CDCl<sub>3</sub>/CD<sub>3</sub>CN (2/1, v/v), room temperature) of a) **6**, **7**, B21C7 ester and secondary ammonium salt with 1 : 1 : 1 : 1 molar ratio; b) **6**, B21C7 ester and secondary ammonium salt with 1 : 1 : 1 molar ratio; c) **7**, B21C7 ester and secondary ammonium salt with 1 : 1 : 1 molar ratio; d) **6**, **7** and B21C7 ester with 1 : 1 : 1 molar ratio; e) **6**, **7** and secondary ammonium salt with 1 : 1 : 1 molar ratio; f) B21C7 ester; g) secondary ammonium salt; h) **7**; i) **6**. Peaks corresponding to complexed and uncomplexed units are designated as "c" and "uc", respectively. Based on Figure S38d–e, preferential recognition between molecular tweezer/gold(III) alkynyl complexes is confirmed without the participation of B21C7 ester or secondary ammonium salt. Meanwhile, specific recognition between B21C7 ester and secondary ammonium salt motifs is also demonstrated, without the involvement of **6** or **7** (Figure S38b–c). Moreover, after mixing equivalent amounts of monotopic compounds together, the resulting spectra (Figure S38a) are almost the overlapping <sup>1</sup>H NMR spectra of the corresponding **6/7** and B21C7/secondary ammonium salt complexes, definitely supporting the non-interfering complexation properties for the two non-covalent recognition motifs.

## 7. Complexation studies for **1–3** via step-wise self-assembly pathway

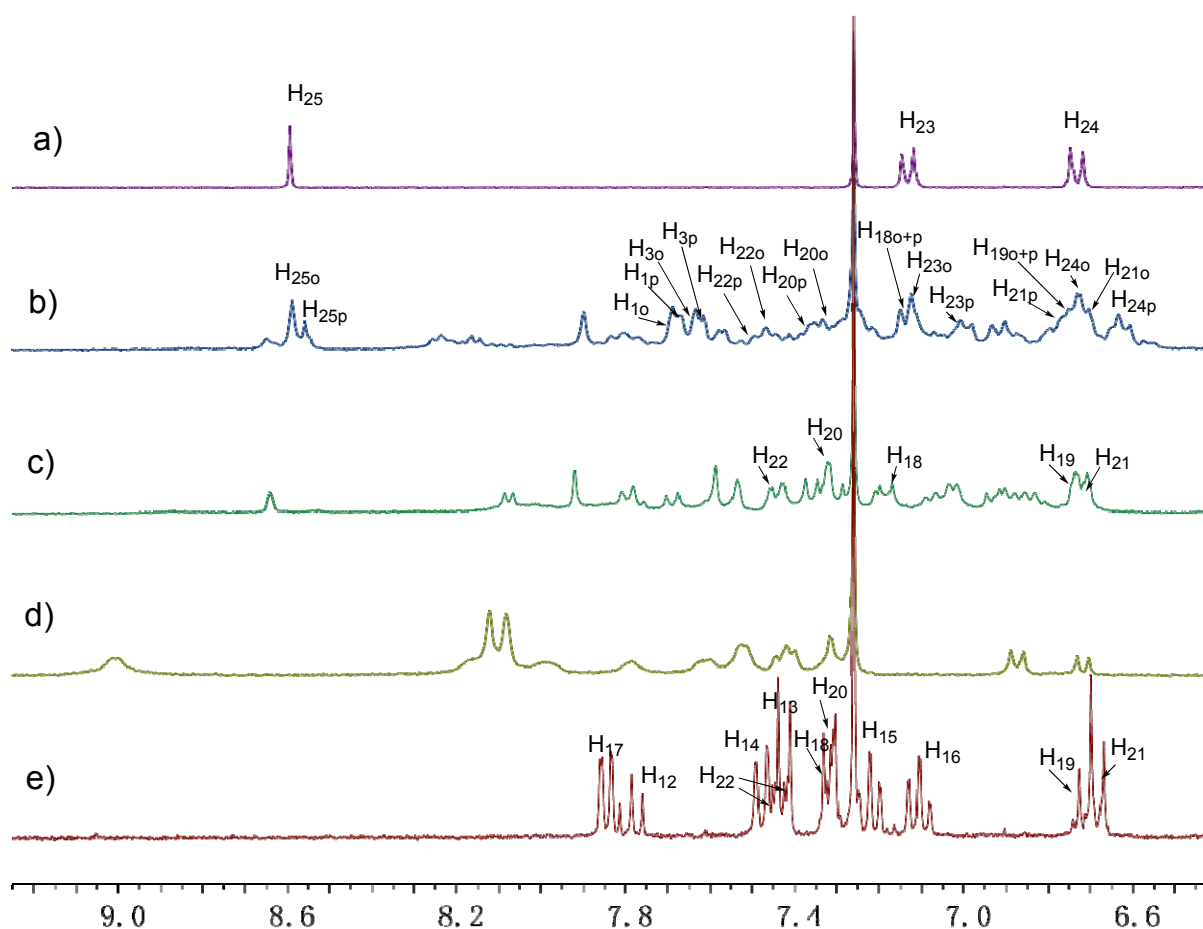

**Figure S39.**  $^1\text{H}$  NMR spectra (300 MHz,  $\text{CDCl}_3/\text{CD}_3\text{CN}$  (2/1, v/v), room temperature) of a) **3**; b) mixture of **1**, **2** and **3** with 3 : 3 : 2 molar ratio; c) mixture of **1** and **2** with 1 : 1 molar ratio; d) **1**; e) **2**.  $[\mathbf{1}] = [\mathbf{2}] = 9$  mM,  $[\mathbf{3}] = 6$  mM. Here “p” and “o” denote the polymeric and oligomeric species, respectively.

## 8. COSY NMR spectra for the mixture of 1–3

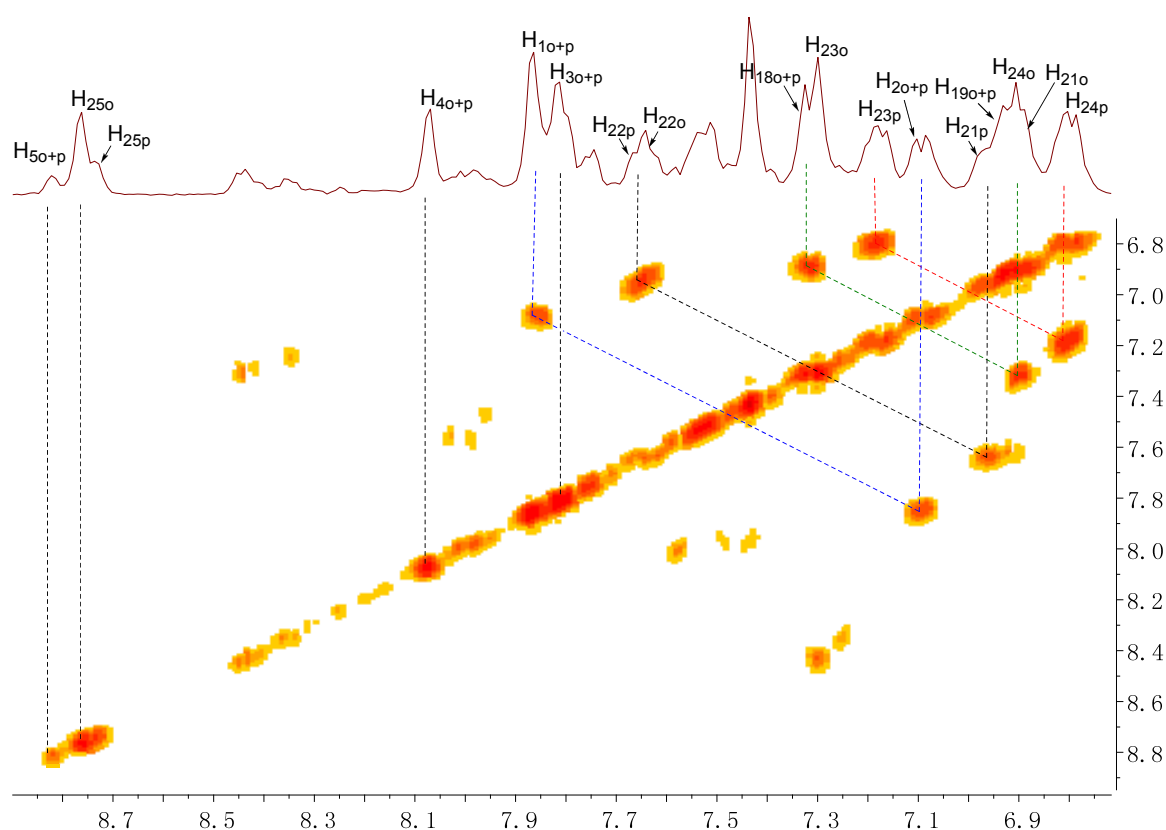

**Figure S40.**  $^1\text{H}$ - $^1\text{H}$  COSY NMR spectrum (400 MHz,  $\text{CDCl}_3/\text{CD}_3\text{CN}$  (2/1, v/v), room temperature) of the mixture of **1**, **2** and **3** with 3 : 3 : 2 molar ratio (concentration of **1** is 9.0 mM). The spectrum facilitates the accurate proton assignments. Strong correlations could be seen between the protons  $\text{H}_1$  and the neighbouring proton  $\text{H}_2$  on the molecular tweezer unit. Moreover, the correlations between  $\text{H}_{18}$  and the neighbouring protons  $\text{H}_{19}$  on **2**,  $\text{H}_{24}$  and  $\text{H}_{23}$  on **3** could also be observed. For the neighbouring B21C7 ester protons the correlations could also be visualized. Here “p” and “o” denote the polymeric and oligomeric species, respectively.



## 9. DOSY experiments for the linear and hyperbranched supramolecular polymers

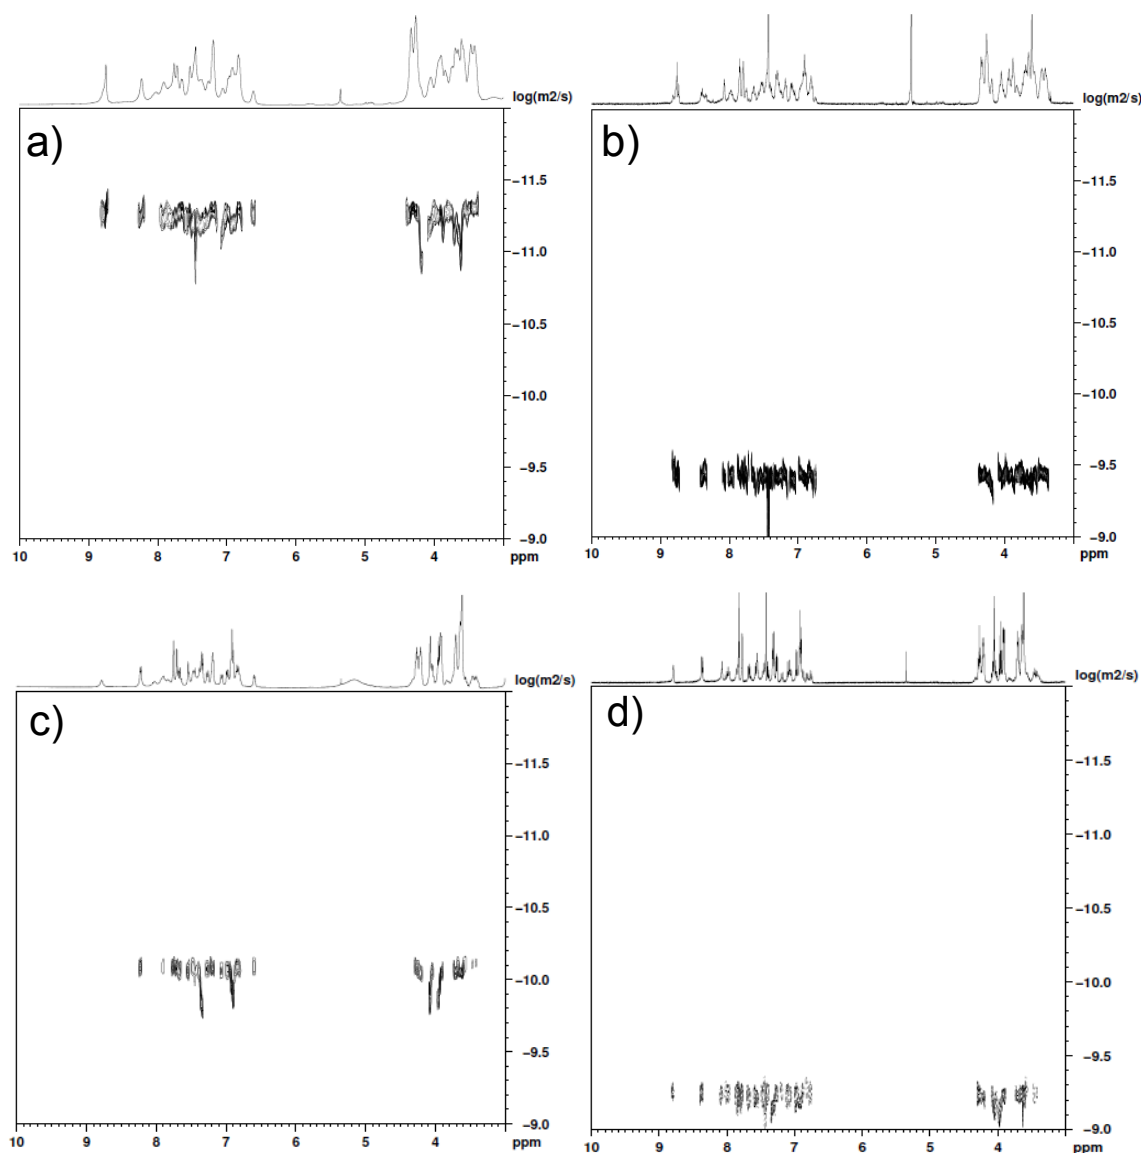

**Figure S41.** Two-dimensional diffusion-ordered NMR (DOSY) spectra of the supramolecular hyperbranched polymers (a and b) and the linear polymers (c and d) in CDCl<sub>3</sub>/CD<sub>3</sub>CN (2/1, v/v) at different monomer concentrations: (a) and (c), 70.0 mM; (b) and (d), 5.00 mM for **1**. As the monomer concentration increases from 5.00 mM to 70.0 mM, the measured diffusion coefficients decrease dramatically from  $3.75 \times 10^{-10}$  to  $5.12 \times 10^{-12} \text{ m}^2 \text{ s}^{-1}$ . Similar trend is also observed for the linear supramolecular polymer, which declines from  $5.83 \times 10^{-10}$  to  $8.49 \times 10^{-11} \text{ m}^2 \text{ s}^{-1}$  under the same conditions. When compared with the results, it is obvious that the self-assembling architectures exert significant impacts on the size of the resulting supramolecular assemblies.

## 10. Stimuli-responsive properties for **5**

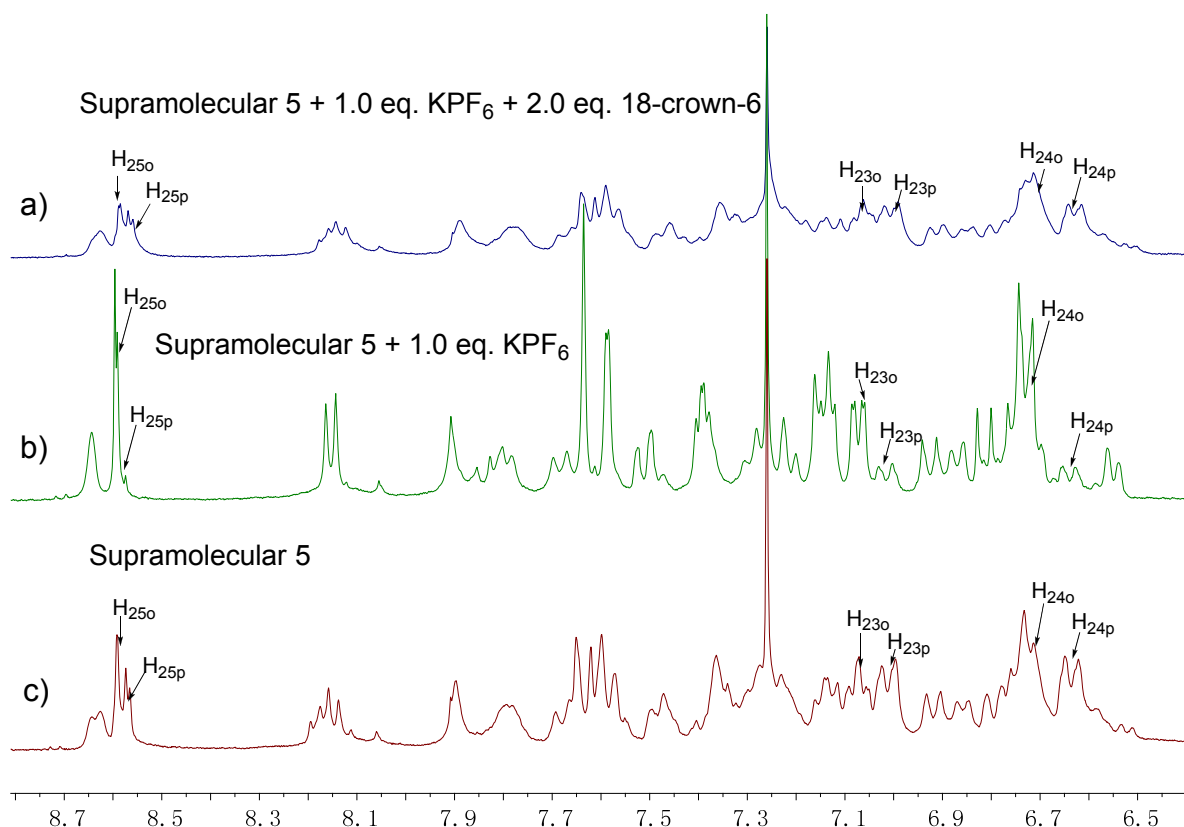

**Figure S42.** Partial  $^1\text{H}$  NMR spectra (300 MHz,  $\text{CDCl}_3/\text{CD}_3\text{CN}$  (2/1, v/v), 298 K) of the supramolecular hyperbranched polymers **5** (8.0 mM based on monomer **1**) with successive addition of  $\text{KPF}_6$  and 18-crown-6, respectively. Here “p” and “o” denote the polymeric and oligomeric species, respectively.

### References:

- [S1] H. K. Yip, L. K. Cheng, K. K. Cheung and C. M. Che, *J. Chem. Soc. Dalton Trans.*, 1993, 2933.
- [S2] Y. K. Tian and F. Wang, *Macromol. Rapid Commun.*, 2014, **35**, 337.
- [S3] K.-H. Wong, K.-K. Cheung, M. C.-W. Chan and C.-M. Che, *Organometallics*, 1998, **17**, 3505.
- [S4] S. A. Hudson, K. J. McLean, S. Surade, Y.-Q. Yang, D. Leys, A. Ciulli, A. W. Munro, and C. Abell, *Angew. Chem., Int. Ed.*, 2012, **51**, 9311.
- [S5] G. T. Wang, C. Wang, Z. Q. Wang and X. Zhang, *Langmuir*, 2011, **27**, 12375.
- [S6] Y. K. Tian, Y. G. Shi, Z. S. Yang and F. Wang, *Angew. Chem., Int. Ed.*, 2014, DOI: 10.1002/anie.201402192.
- [S7] Q. B. Li, Y. Y. Bao, H. Wang, F. F. Du, Q. Li, B. K. Jin and R. K. Bai, *Polym. Chem.*, 2013, **4**, 2891.
- [S8] Y. Tanaka, K. M. -C. Wong, V. W. -W. Yam, *Chem. Eur. J.*, 2013, **19**, 390.
